# Supplementary material for: Structural tuning enables piezochromic and photochemical properties in N-aryl-β-enaminones
Source: Royal Society of Chemistry journal article supplement (doi:10.1039/c9ra07598d), 2019-01-01

## Structural Tuning Enables Piezochromic and Photochemical Properties in *N*-Aryl- $\beta$ -Enaminones

Wan-Chi Hsieh, Kiran B. Manjappa,\* and Ding-Yah Yang\*

*Department of Chemistry, Tunghai University,*

*No. 1727, Sec. 4, Taiwan Boulevard, Xitun District, Taichung 40704,  
Taiwan*

\*Corresponding author; Tel: 886-4-2359-7613; Fax: 886-4-2359-0426;

Email: kiran@thu.edu.tw; yang@thu.edu.tw

### Supporting Information

#### Table of Contents

1. Color transition of the synthesized *N*-aryl- $\beta$ -enaminones **4g–j**.....S2
2. Absorption spectra of **4s** and **5** .....S3
3. Copies of  $^1\text{H}$  and  $^{13}\text{C}$  NMR spectra of synthesized compounds **4a–s**, **5**...S4-S43

## Piezochromic behavior of the synthesized *N*-aryl- $\beta$ -enaminones

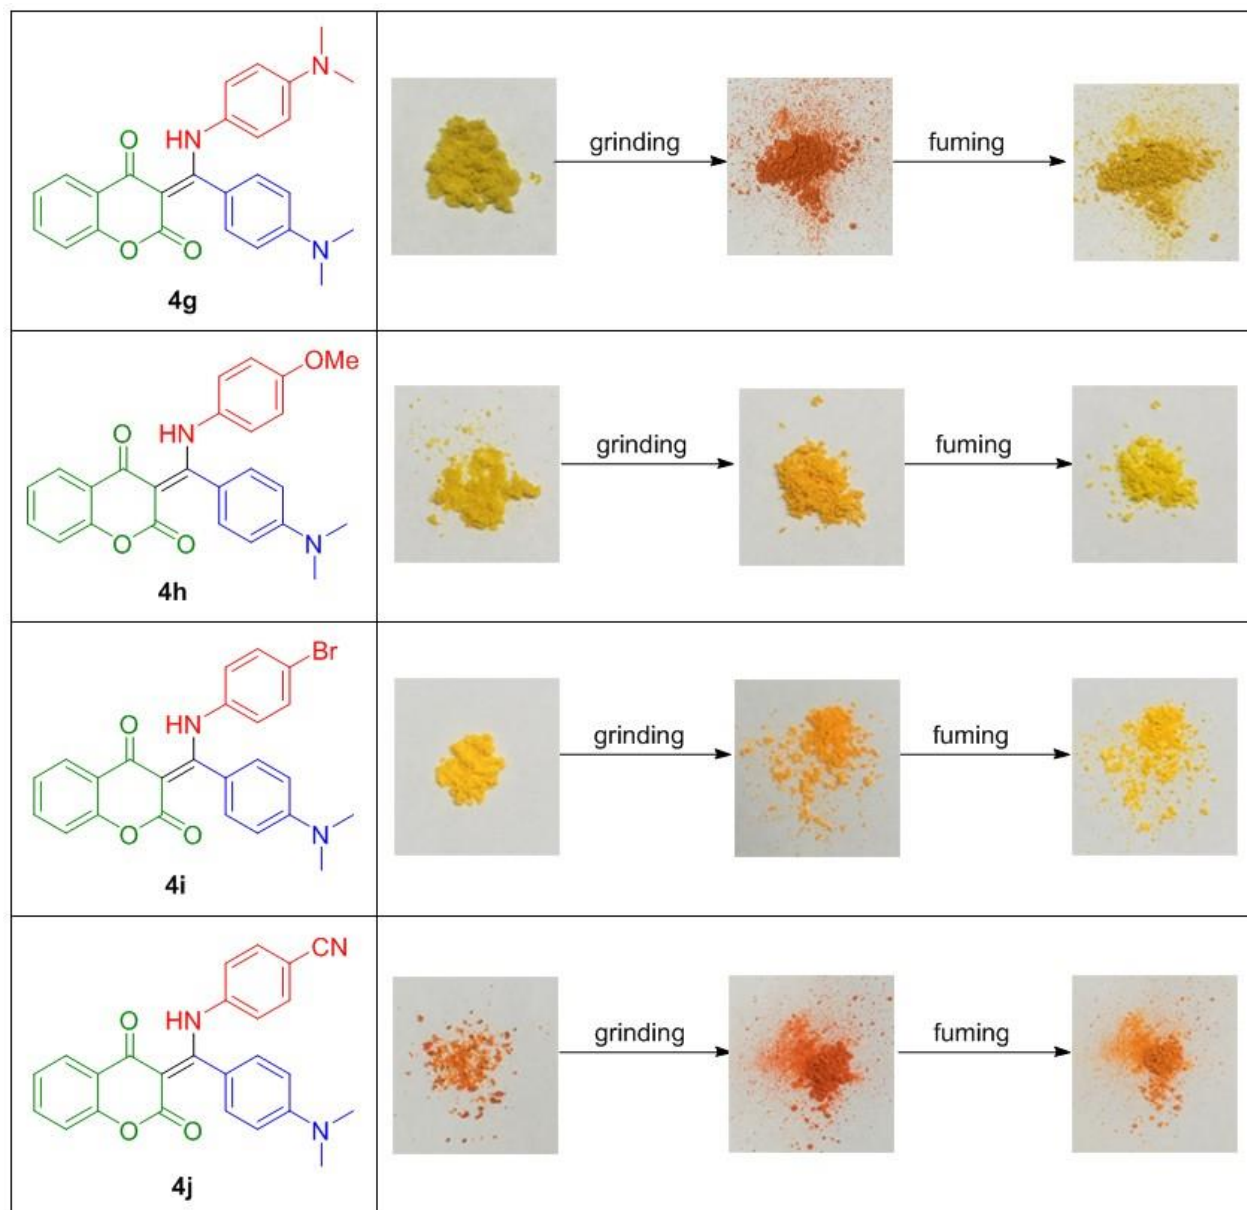

**Figure S1.** Color transition of the synthesized *N*-aryl- $\beta$ -enaminones during grinding and fuming.

## Photochemical reaction of *N*-aryl- $\beta$ -enaminone **4s**

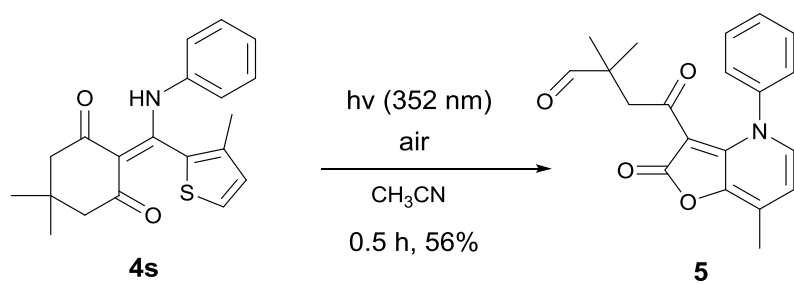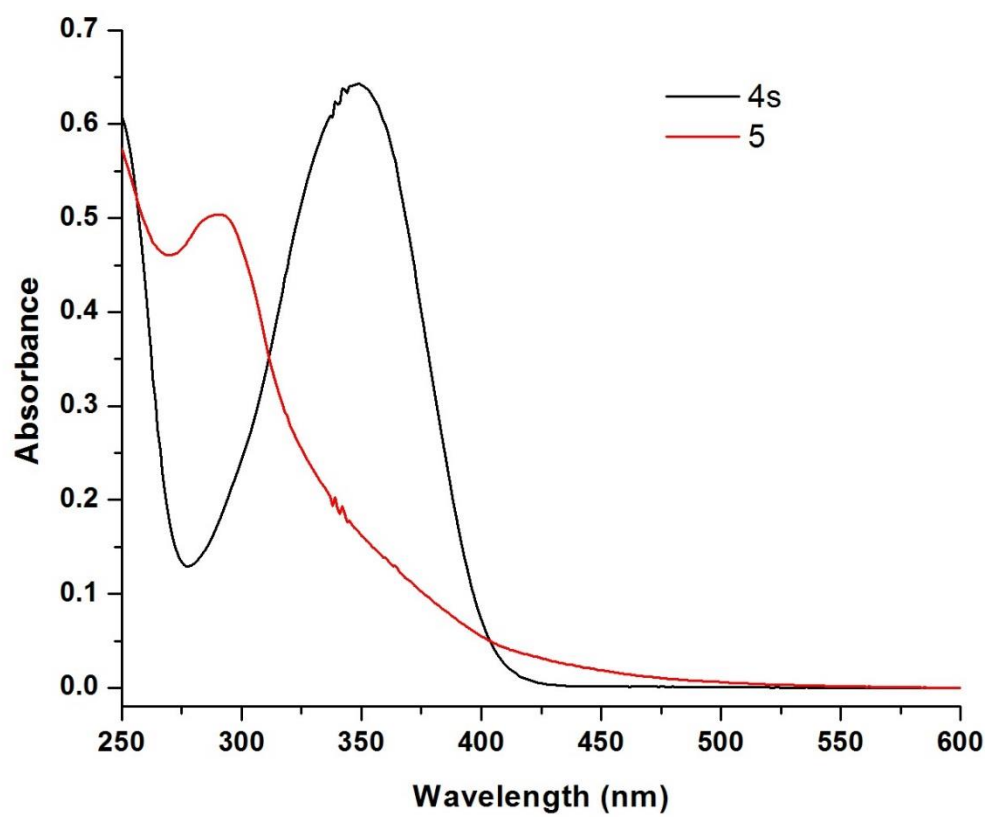

**Figure S2.** Absorption spectra of compounds **4s** and **5** ( $3.0 \times 10^{-5}$  M in  $\text{CH}_3\text{CN}$ )

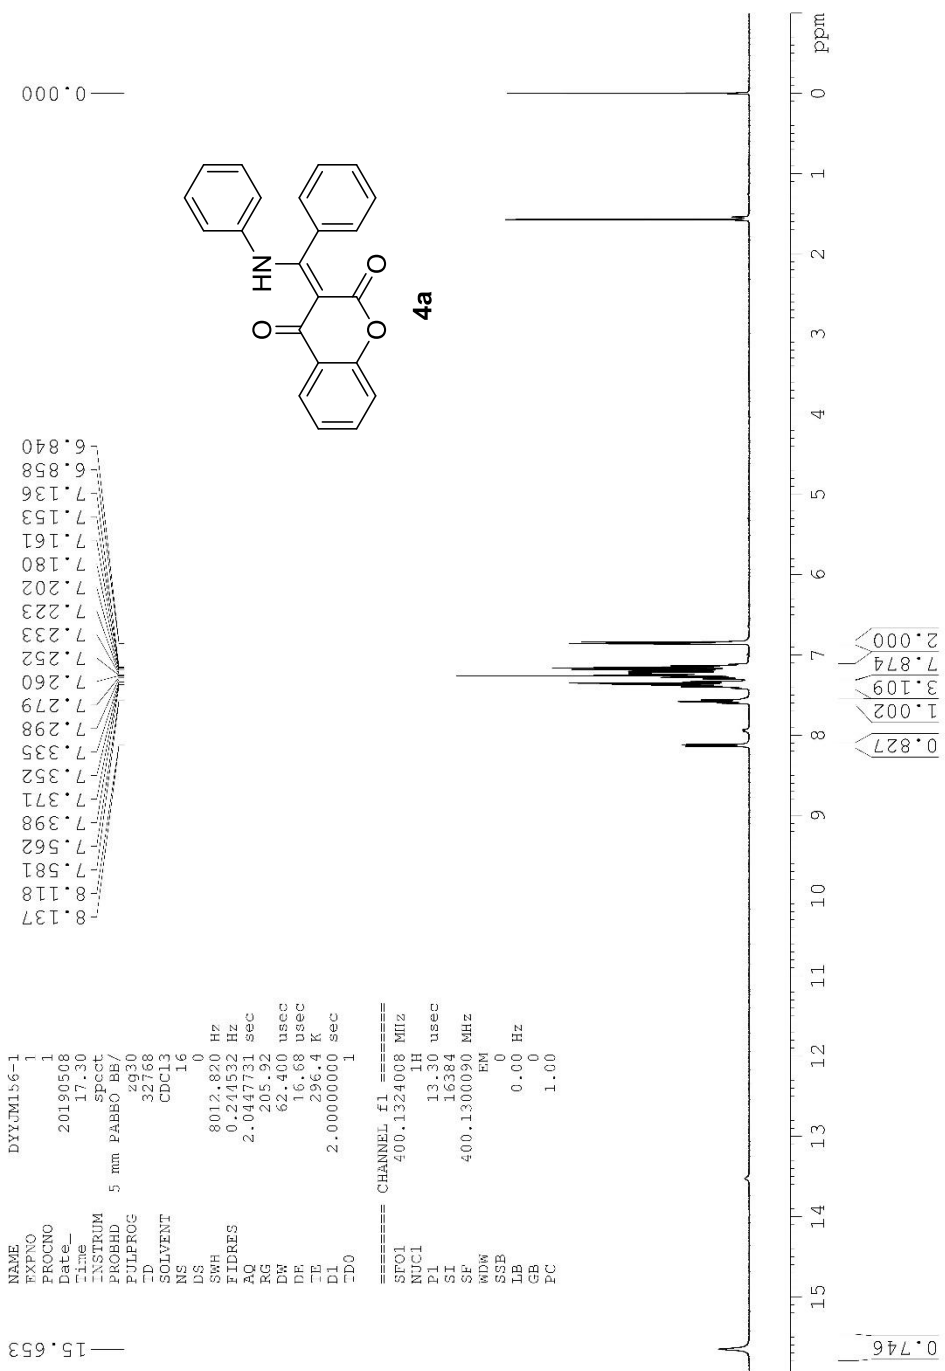

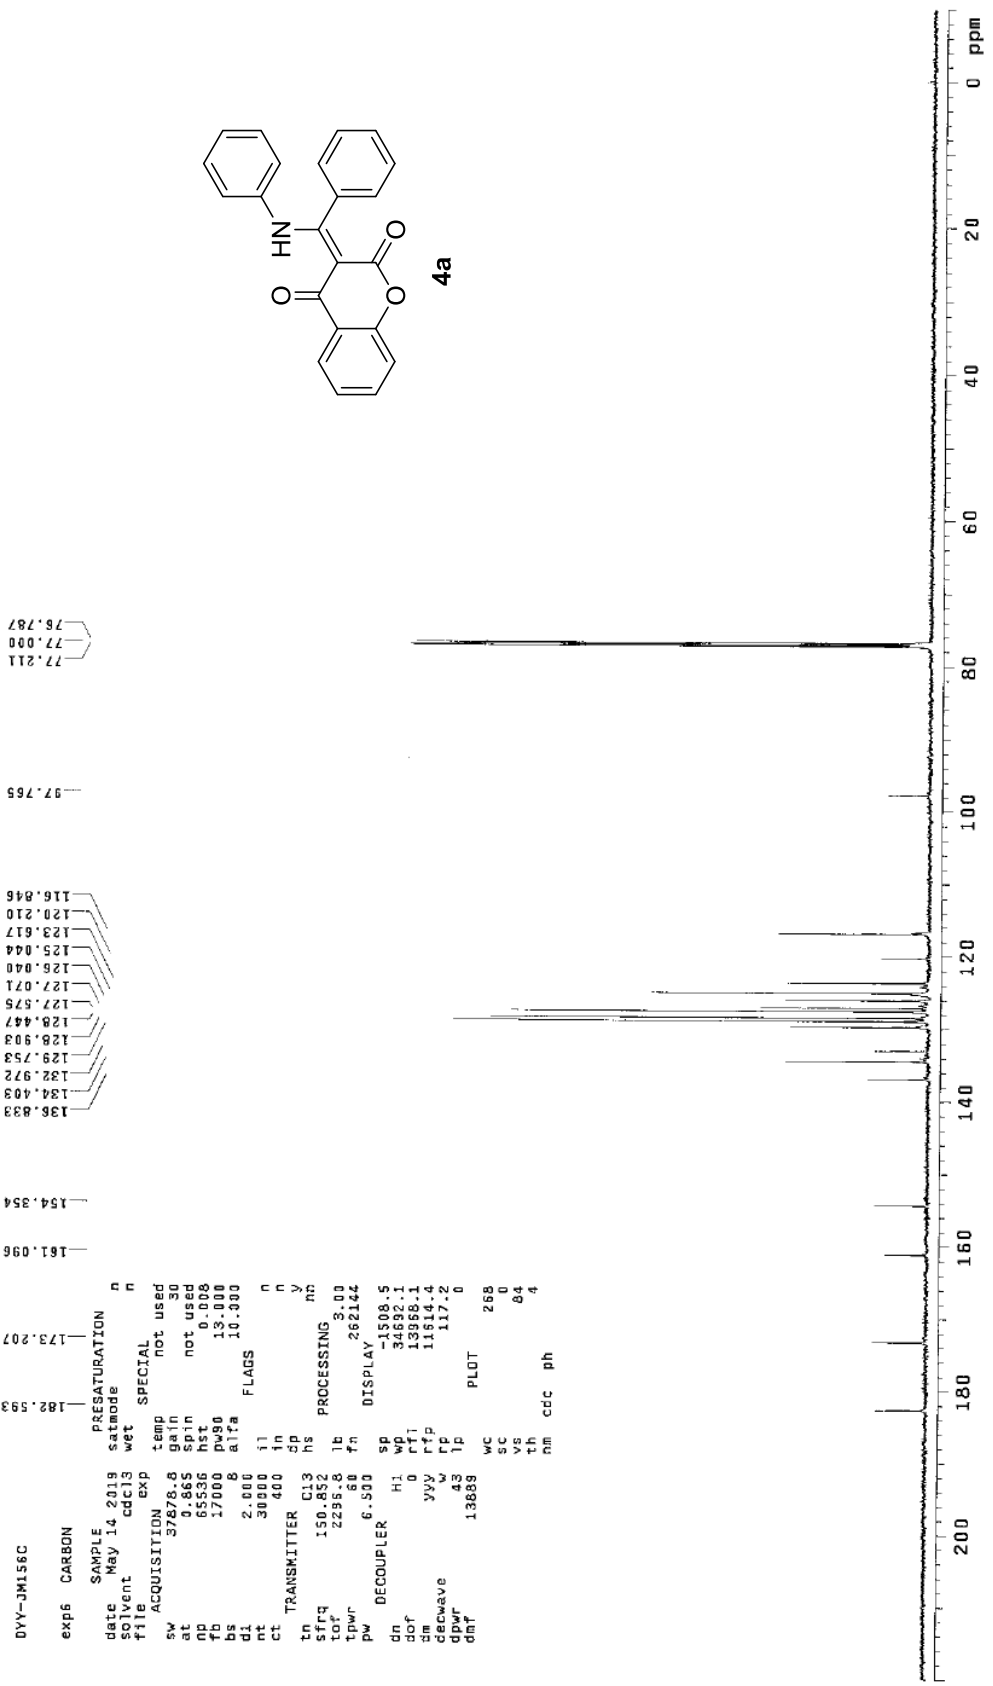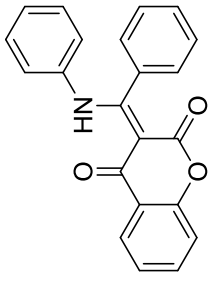

4a

```

exp6 CARBON
SAMPLE
date May 14 2018
solvent cdcl3
file
sw 37878.8 gain 30
at 0.865 spin not used
no 65536 hst 0.008
fb 17000 pw90 13.000
bs 8 alfa 10.000
di 2.000
nt 30000
ct 400
tn TRANSMITTER
trf 150.852
tor 2295.8
tpwr 6.500
pw DECOUPLER
dn H1
dof 0
sm yyv rfp
decwave 43
dppr 13889
dmf
PRESATURATION
satmode
wet SPECIAL
temp not used
gain 30
spin not used
hst 0.008
pw90 13.000
alfa 10.000
FLAGS
n n
in n
sp y
hs y
CL3
hs
PROCESSING
nb 3.00
fb 262144
DISPLAY
sp 21308.5
wc 268
sc 0
vs 84
th 4
nm cdc ph
  
```

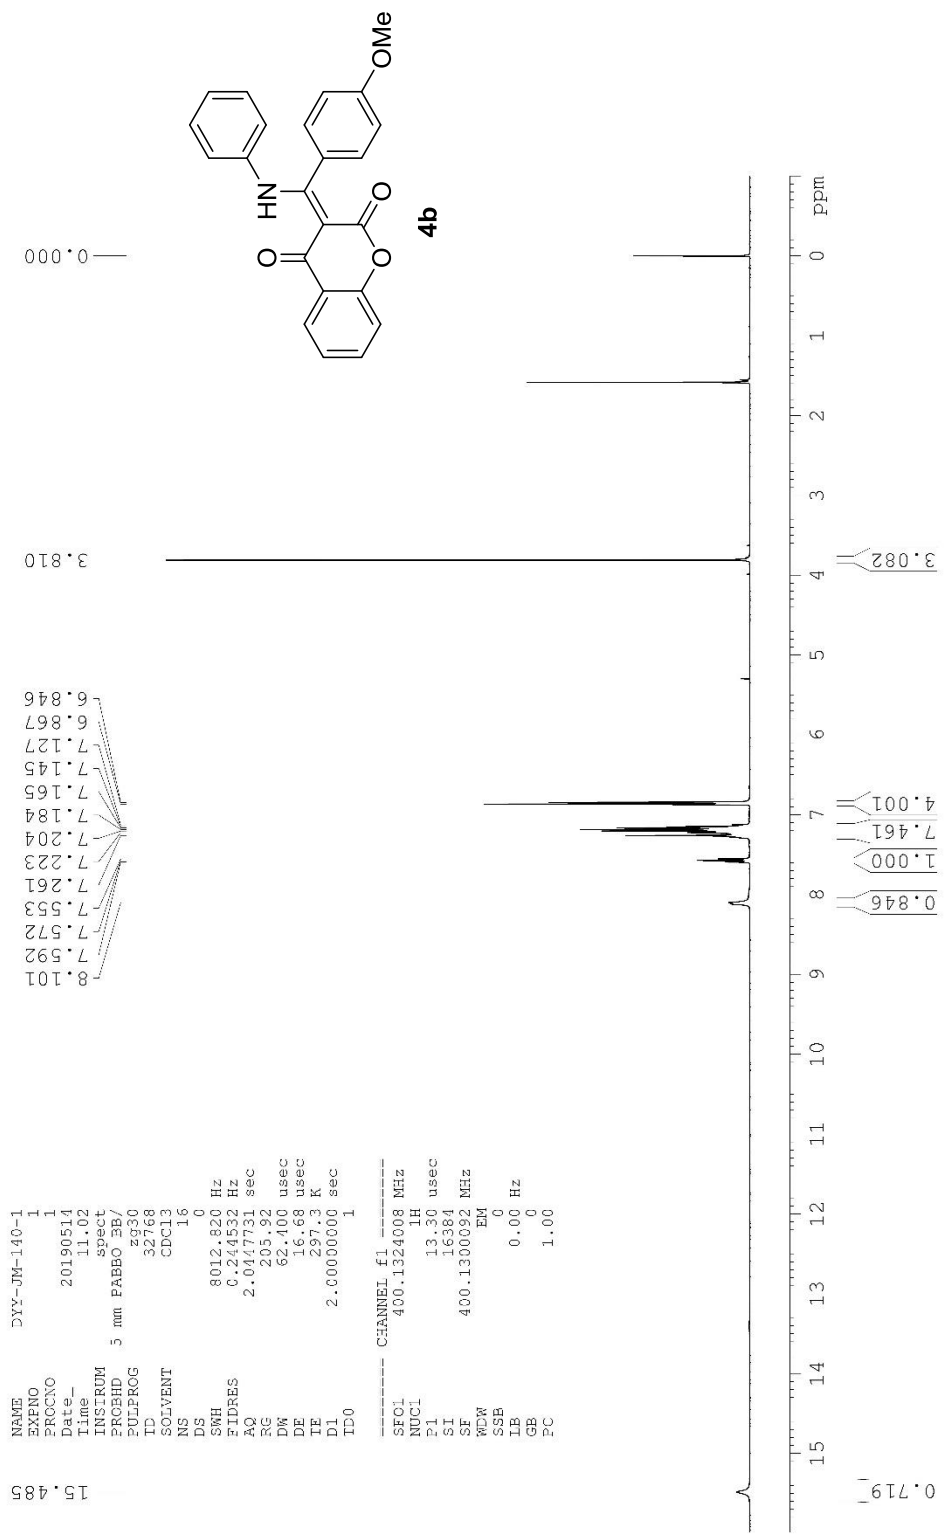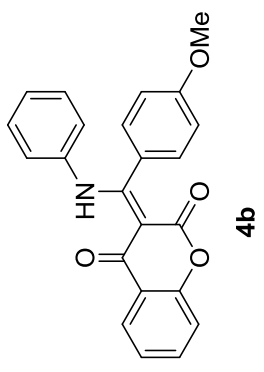

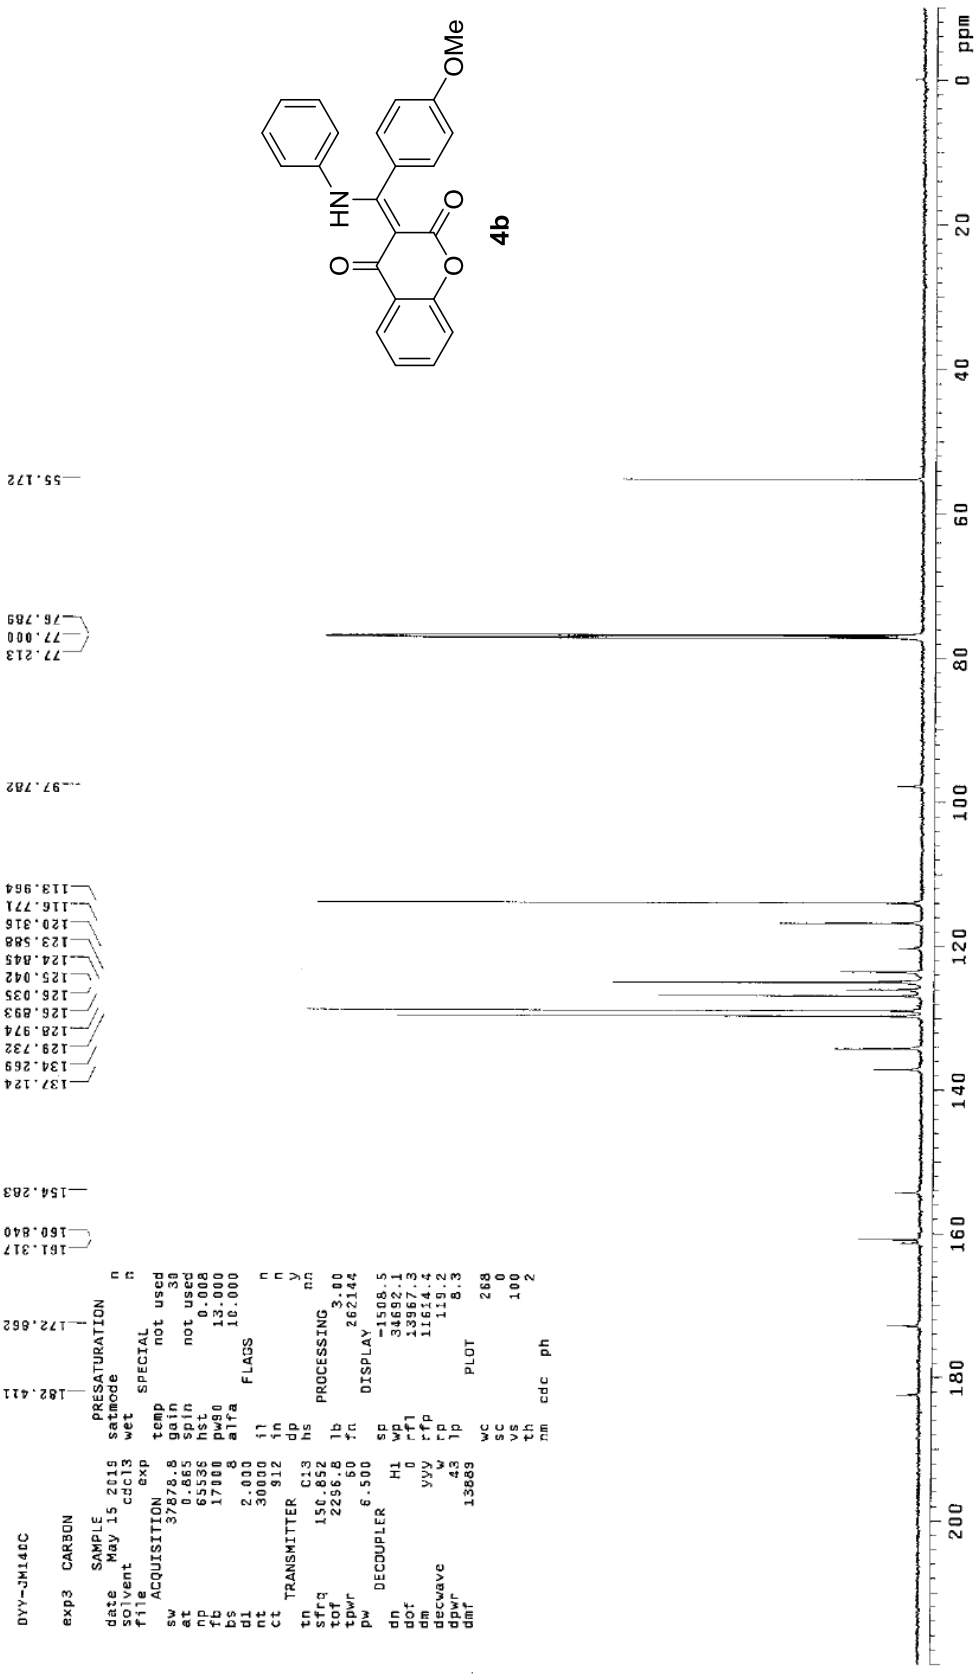

```

exp3 CARBON
date May 15 2018
solvent cdc13
file cdc13
sw 37878.8 gain not used
at 0.665 spin 30
np 65536 hst not used
fb 17000 pws0 0.008
bs 8 alfa 13.000
d1 2.000
nt 30000 fl
ct 912 in
tn TRANSMITTER C23
strq 150.852 hs
tot 2296.6 lb
pwr 6.500 rn
pw DECOUPLER H1 VP 1508.5
df 0 ffl 34892.1
dm vvy ffp 13967.3
decwave w fp 11614.4
dpr 43 tp 119.2
dmf 13863 PLOT
wc 268
sc 0
vs 100
th cdc ph 2
  
```

```

NAME          DYY-JM-138
EXPNO         1
PROCNO        1
Date_         20190111
Time          10.38
INSTRUM       spect
PROBHD        5 mm PABBO BB/
PULPROG       zg30
TD            32768
SOLVENT       CDCl3
NS            16
DS            0
SWH           8012.820 Hz
FIDRES       0.244532 Hz
AQ           2.0447731 sec
RG           205.92
DM           62.400 usec
DE           16.68 usec
TE           297.8 K
SI           16384
WDW           EM
SSB           0
LB           0.00 Hz
GB           0
PC           1.00
  
```

15.588

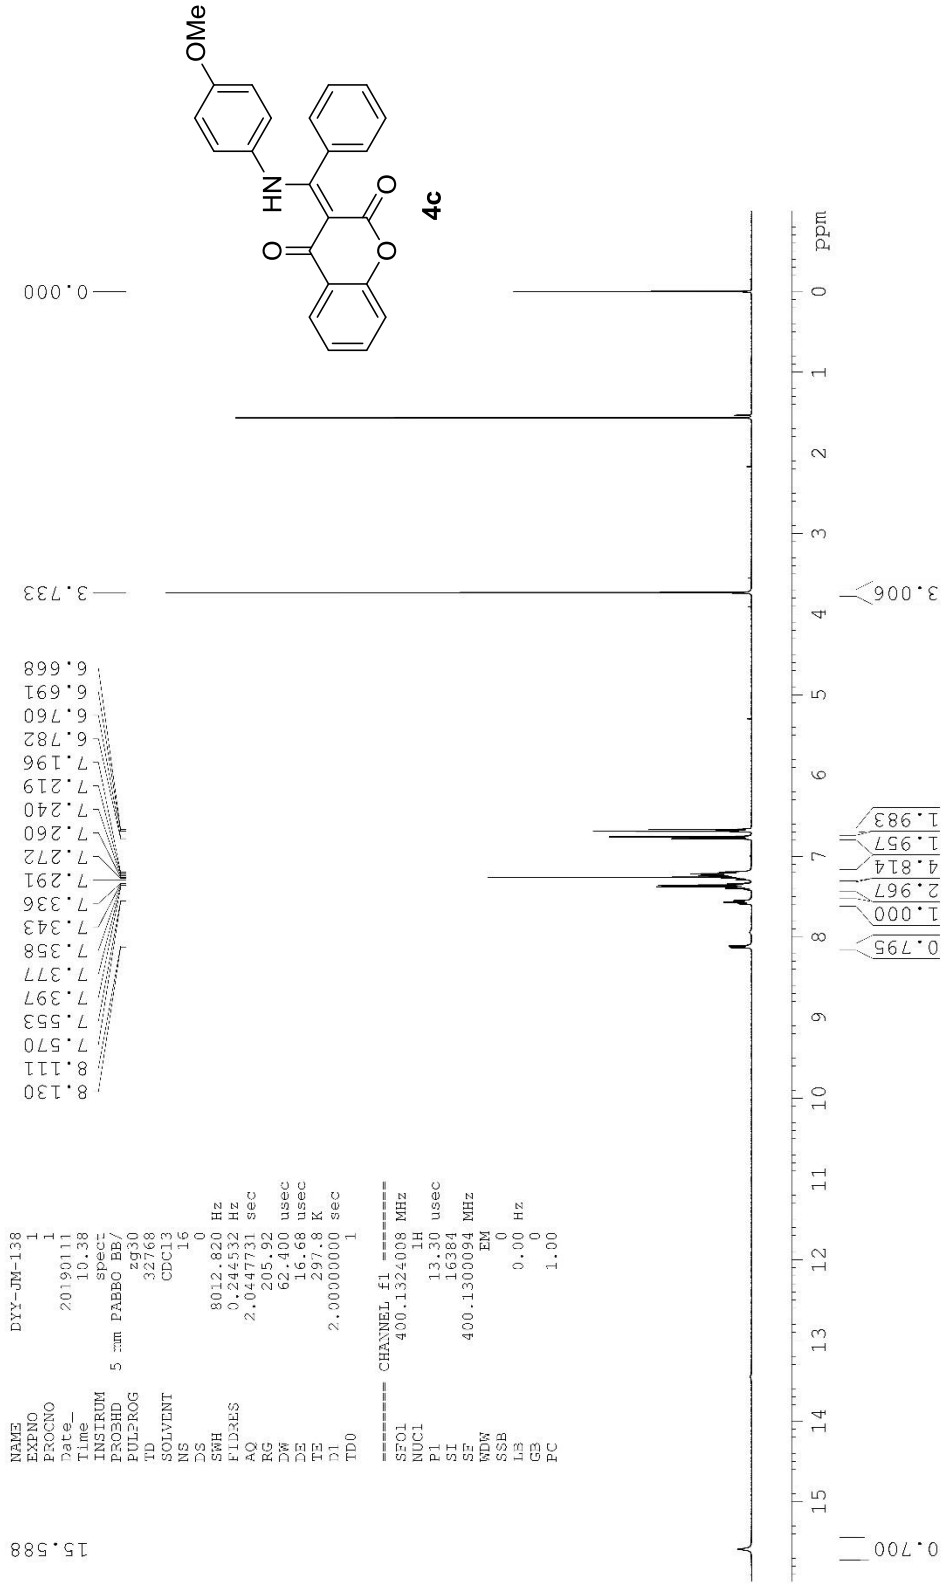



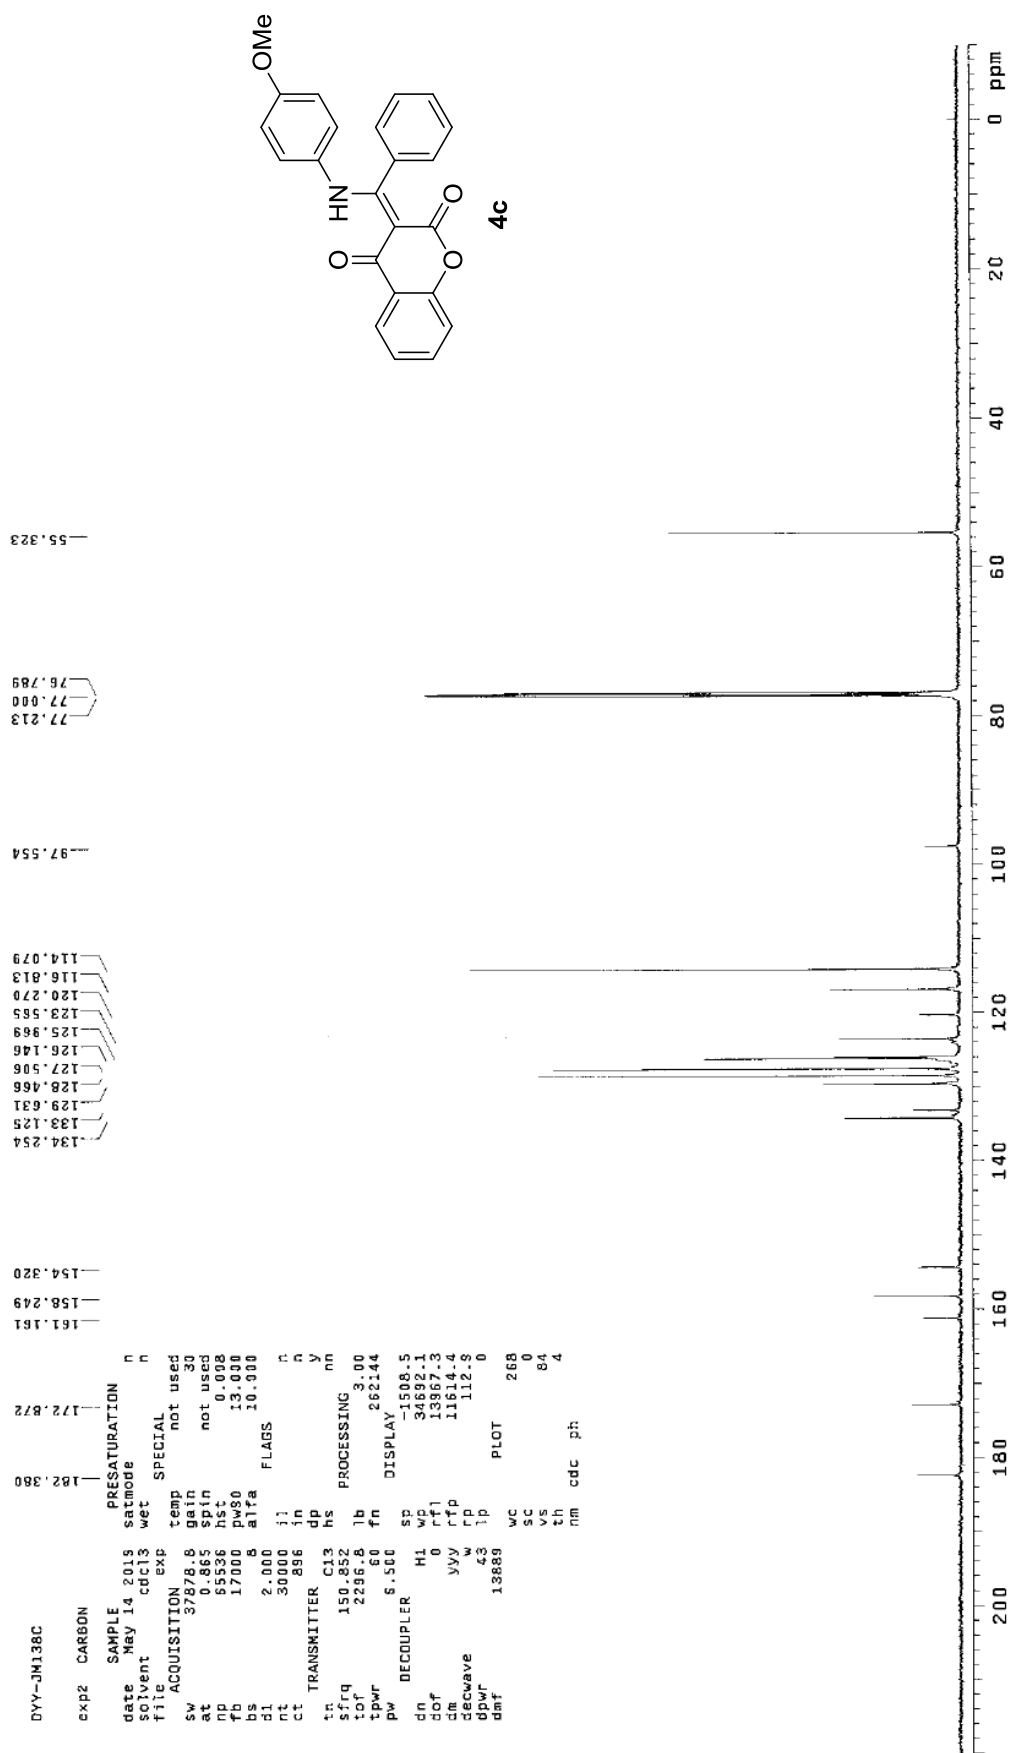

```

DYY-JM138C
EXP2 CARBON
DATE SAMPLE PRESATURATION
MAY 14 2015 satmode n
PROC 13C
F1 FID cdc13 wet n
SOLVENT cdcl3 SPECIAL not used
SW 37878.8 gain 30
AQ 0.565 spin not used
RG 55336 hst 0.008
FB 17000 DWS0 13.000
BS 2.000 alpha 10.000
D1 30000 i1
NT 896 in n
CT TRANSMITTER dp y
IR C13 hs
SFRQ 150.852 PROCESSING nn
TOF 2295.8 lb 3.00
TPWF 60 fn 262144
PW 5.500 DISPLAY
DECOUPLER SP -1508.5
DN H1 WPL 34692.1
DOF 0 RFL 13867.3
DM YYY RFP 11614.4
DEWAVE W RP 112.8
DPWF 43 IP 0
DMF 13889 WC 268
SC 0
VS 84
CN nm cdc ph 4

```

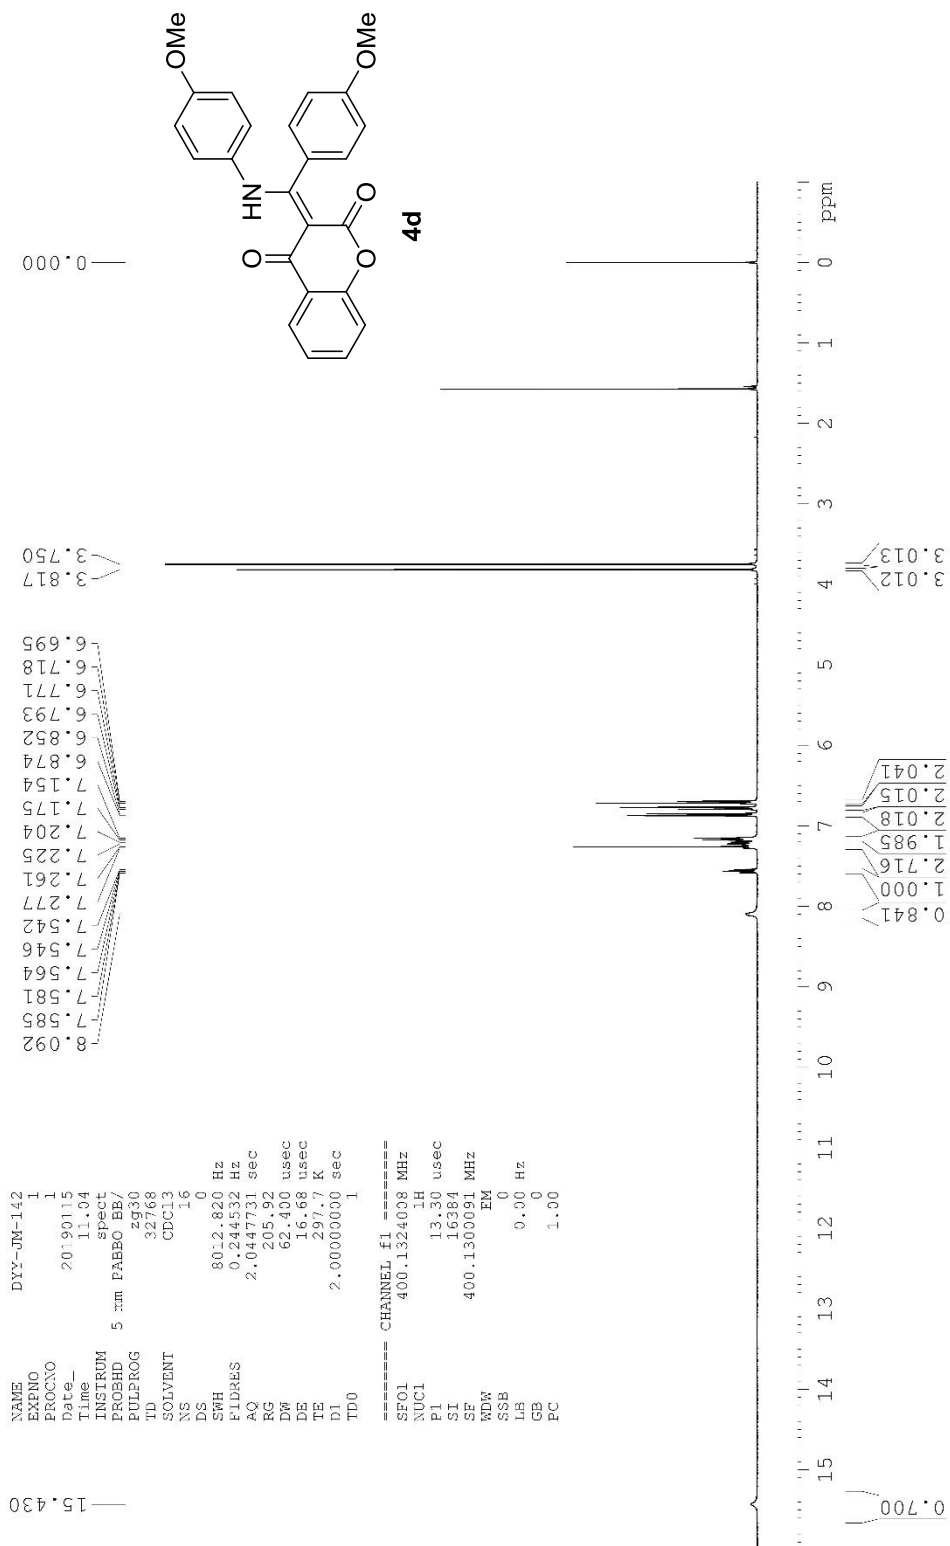

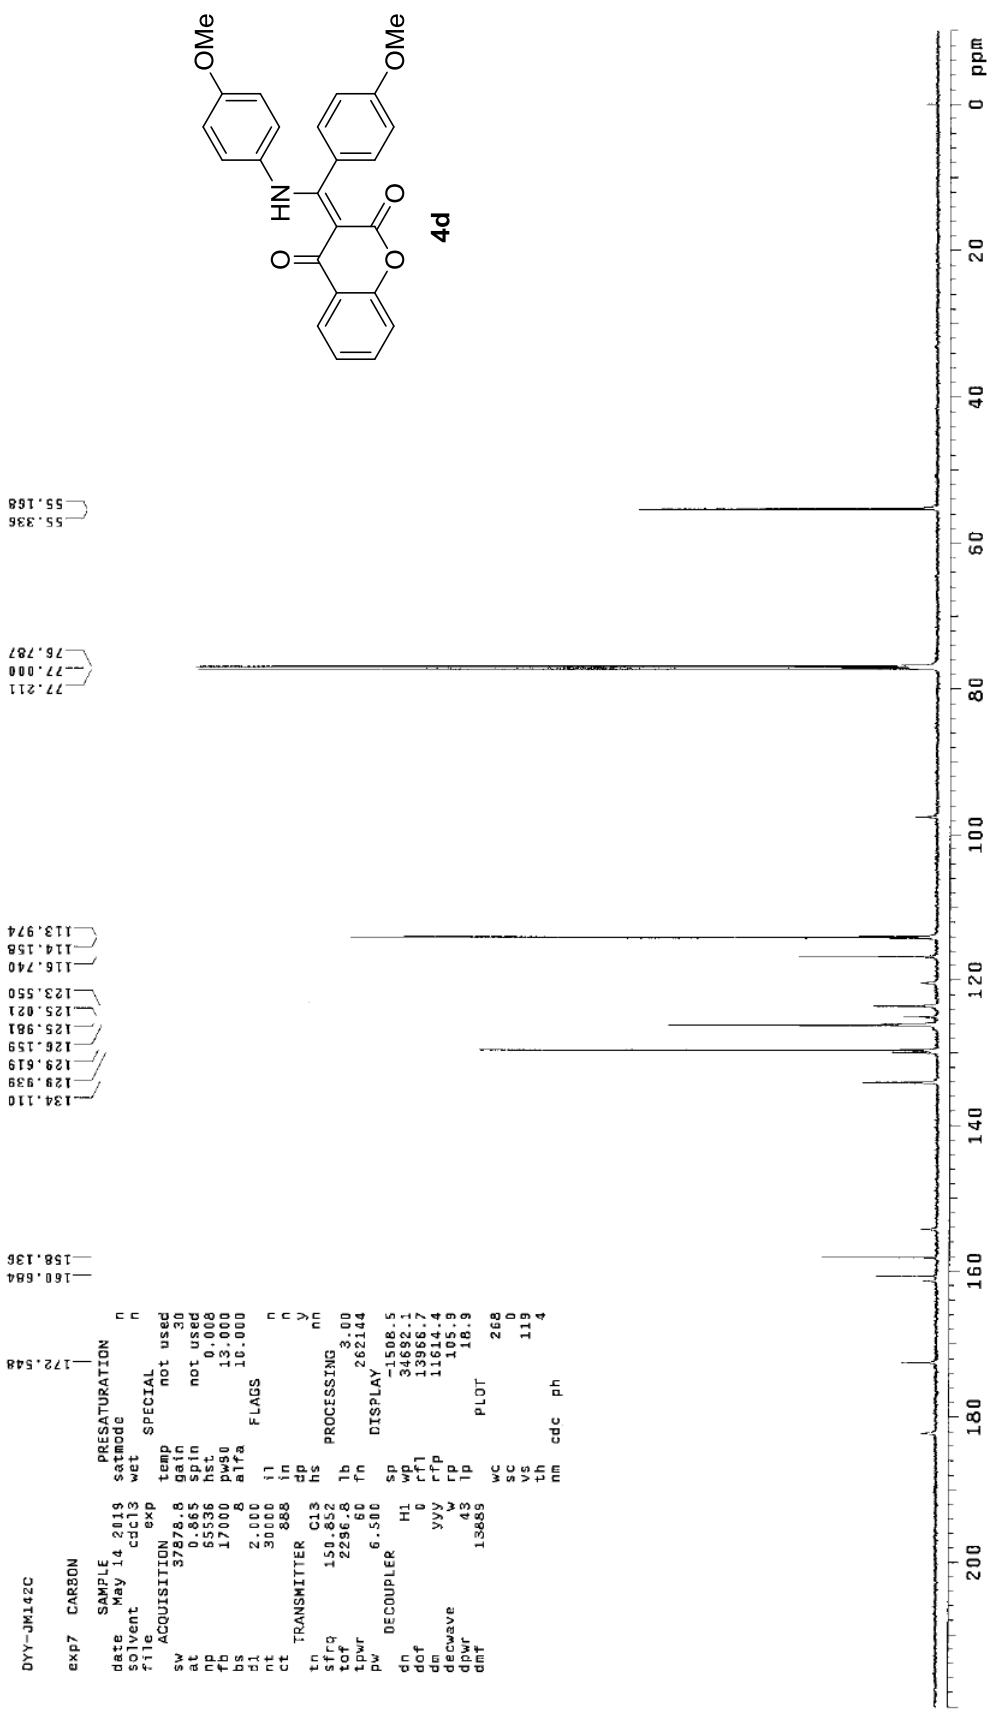

```

DYY-JM142C
exp7 CARBON
SAMPLE
date May 14 2019
solvent cdc13
file
sw 37878.8 gain not used
at 0.665 spin not used
fp 6536 hsc 0.000
br 17000 pw50 13.000
d1 2.000 sflra 10.000
nt 30000 il
ct TRANSMITTER 888 in n
tn hs
sfrq 150.852 lb PROCESSING n
tof 2296.8 fh 3.00
tpwr 60 fh 26214
pw 6.500 SP DISPLAY
dn H1 wp -1508.5
dof 0 rfl 34692.1
dm yyy rfp 13966.7
decwave w rp 11614.4
dpr 43 rp 105.9
dmf 18689 lp 18.9
wc 268
sc 0
ts 113
tn nm
nm cdc ph 4
  
```

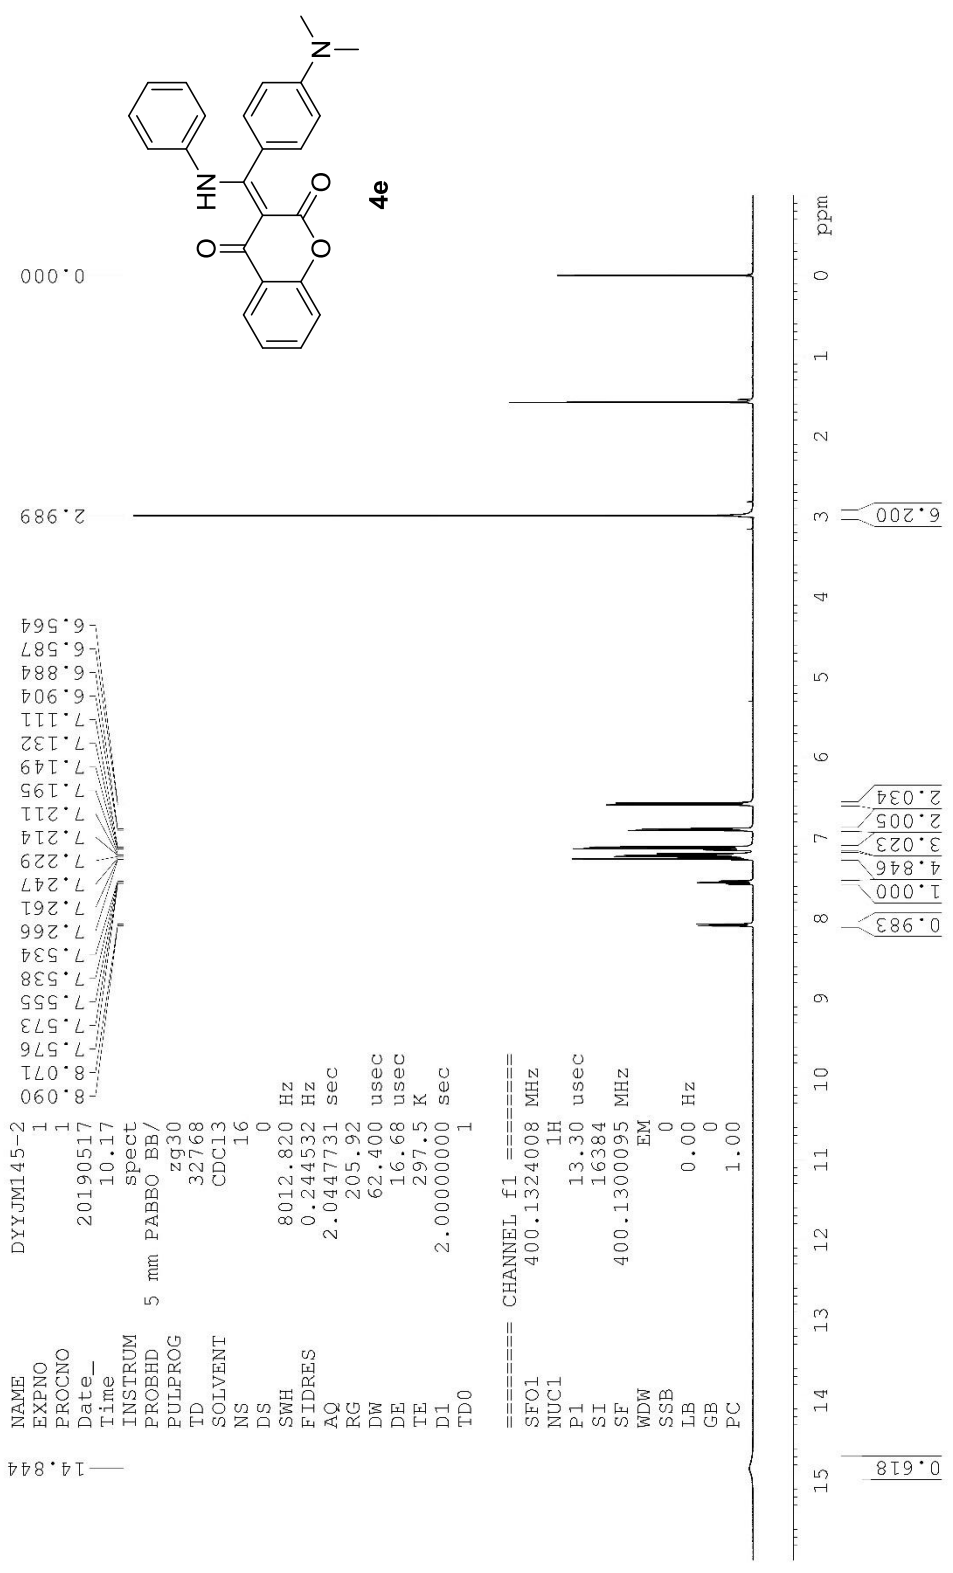

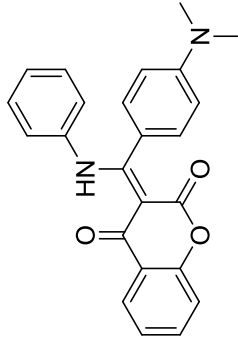

4e

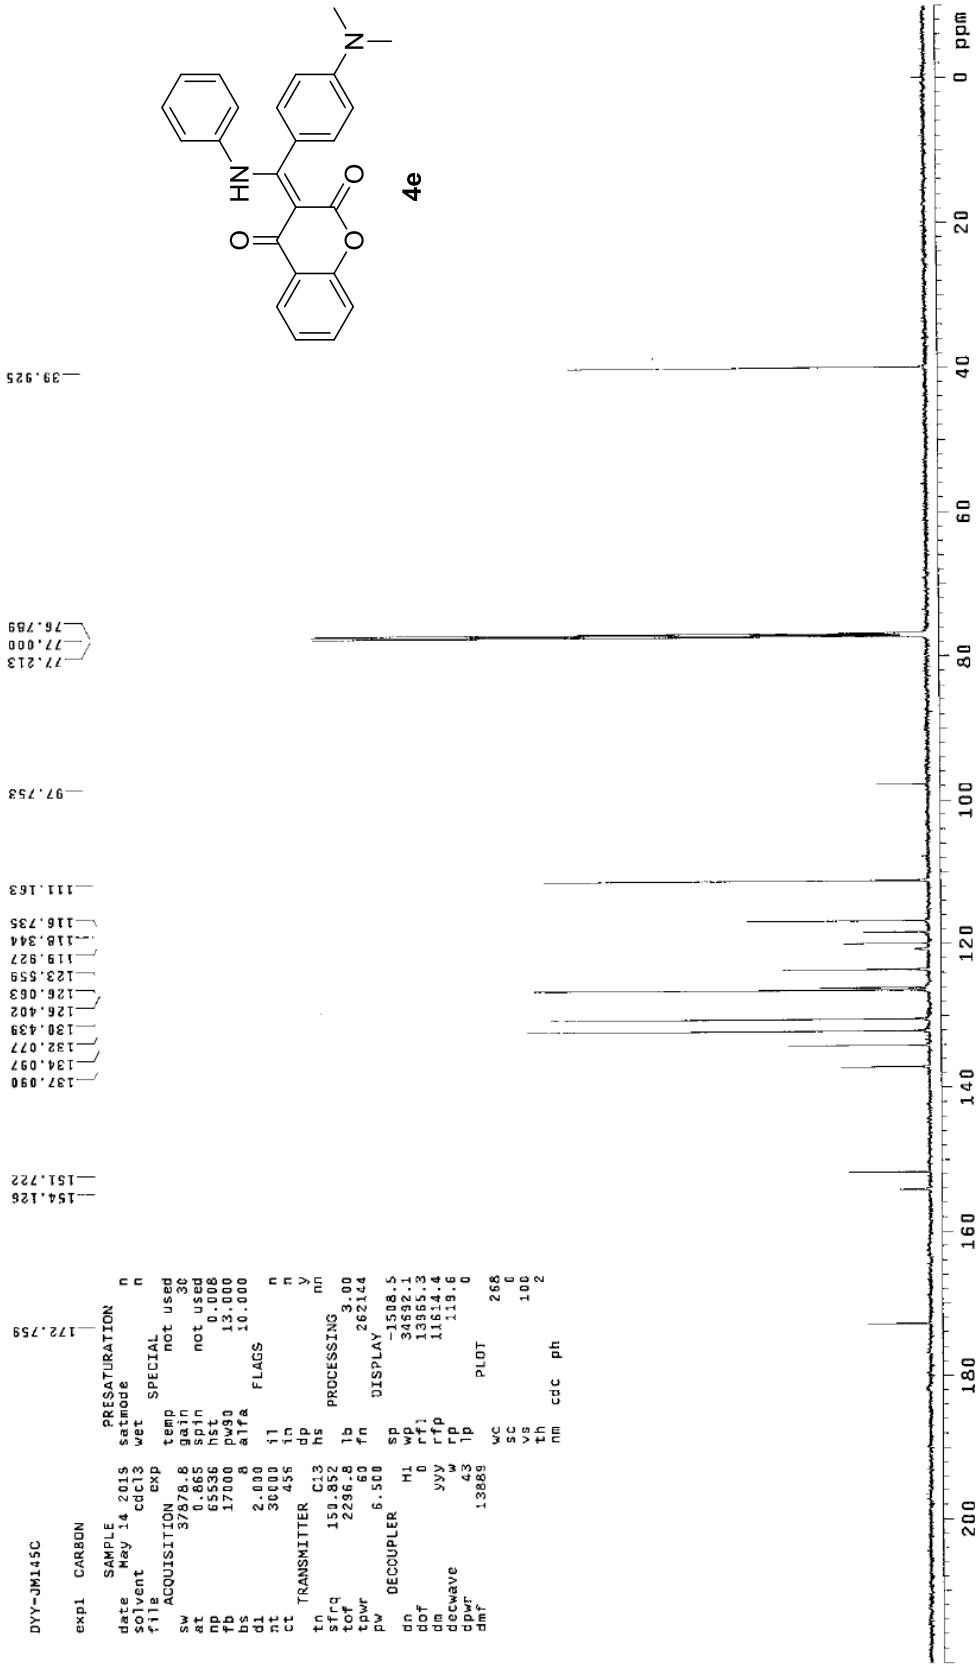

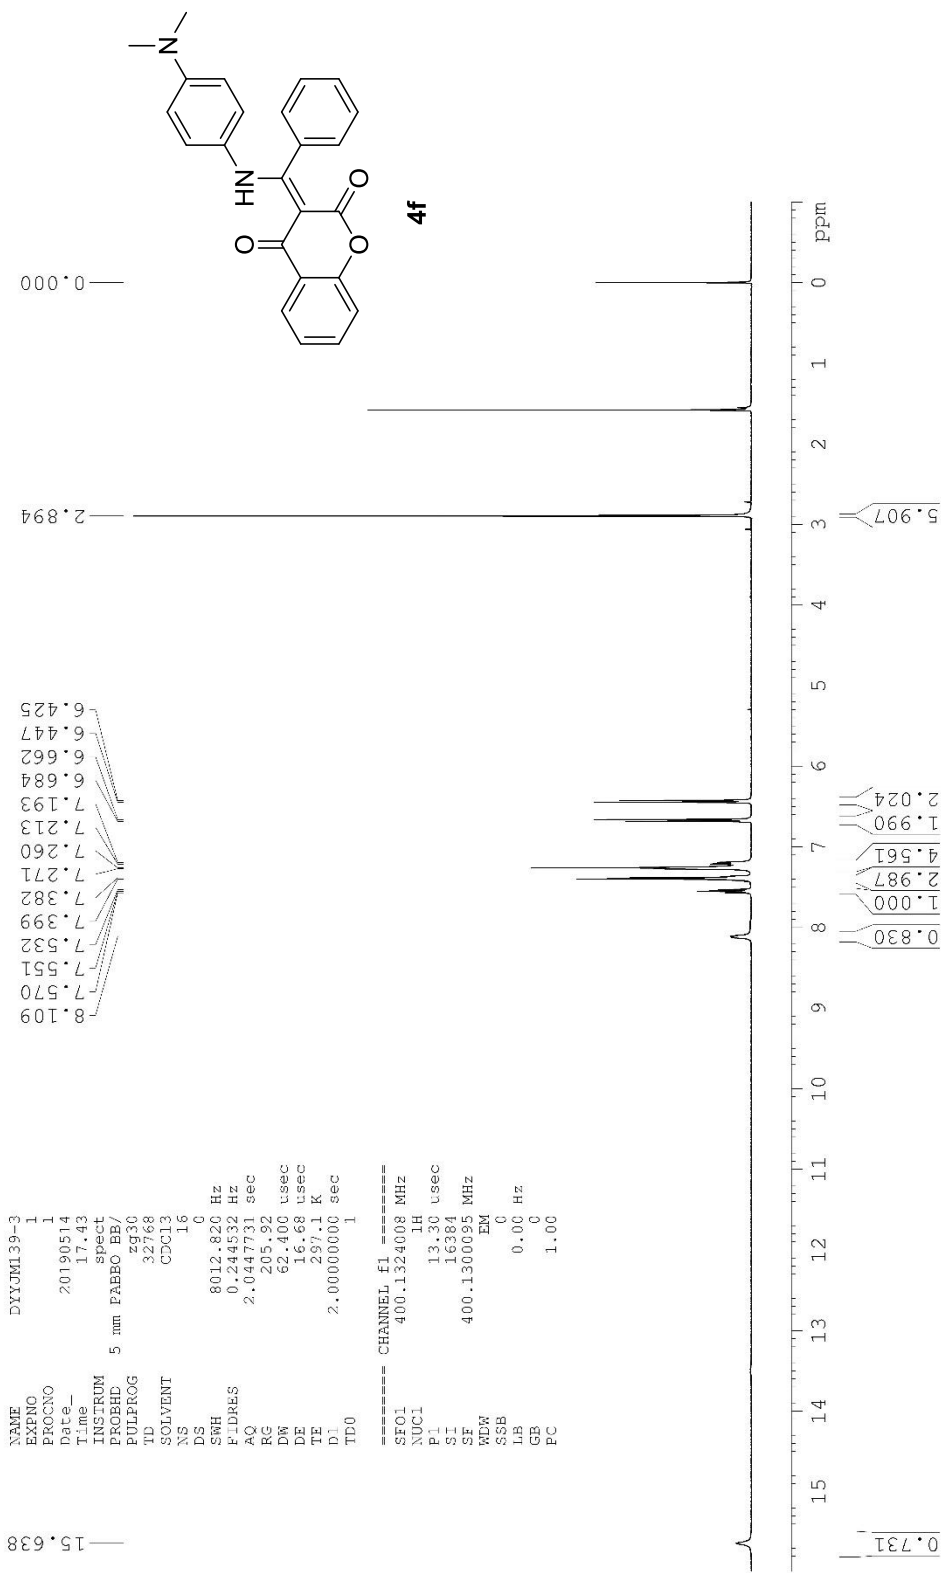

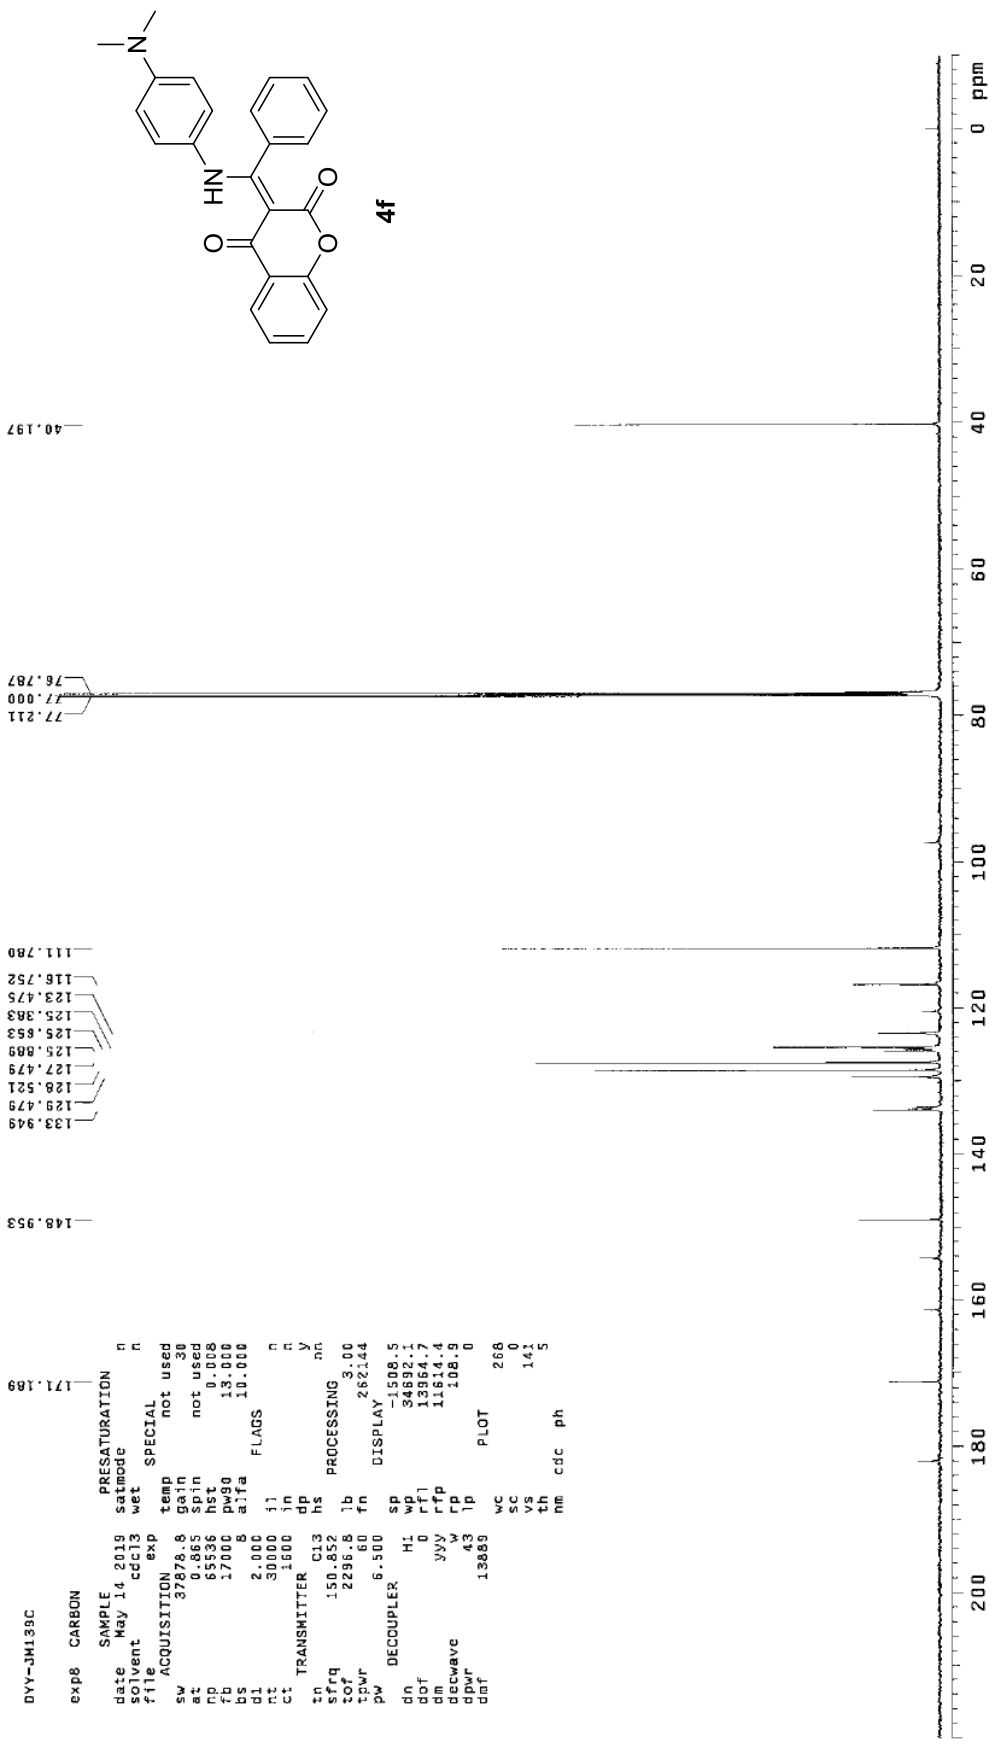

```

exp8 CARBON
SAMPLE PRESATURATION n
date May 14 2018 satmode n
solvent cdcl3 wet
file cd13 SPECIAL
sw ACQUISITION exp temp not used
at 37878.8 gain 30
pd 0.865 spin not used
fb 65536 hst 0.008
bs 17000 pw90 13.000
d1 2.000 a1fa 10.000
rt 30000 f1 n
ct 1600 in n
TRANSMITTER dp y
tn c13 hs
sfrq 150.852 PROCESSING no
tof 2295.8 lb 3.00
tpr 60 tn DISPLAY 282.44
pw DECOUPLER 0.500 sp -1508.5
dd wp 34892.1
dof rfl 13864.7
dncwve yyy rfp 11618.6
dpr pp 108.6
dbf 43 tp 13680
dbf 13680 wc 268
SC SC 0
VS VS 141
th th cdc ph 5
nm cdc ph
  
```

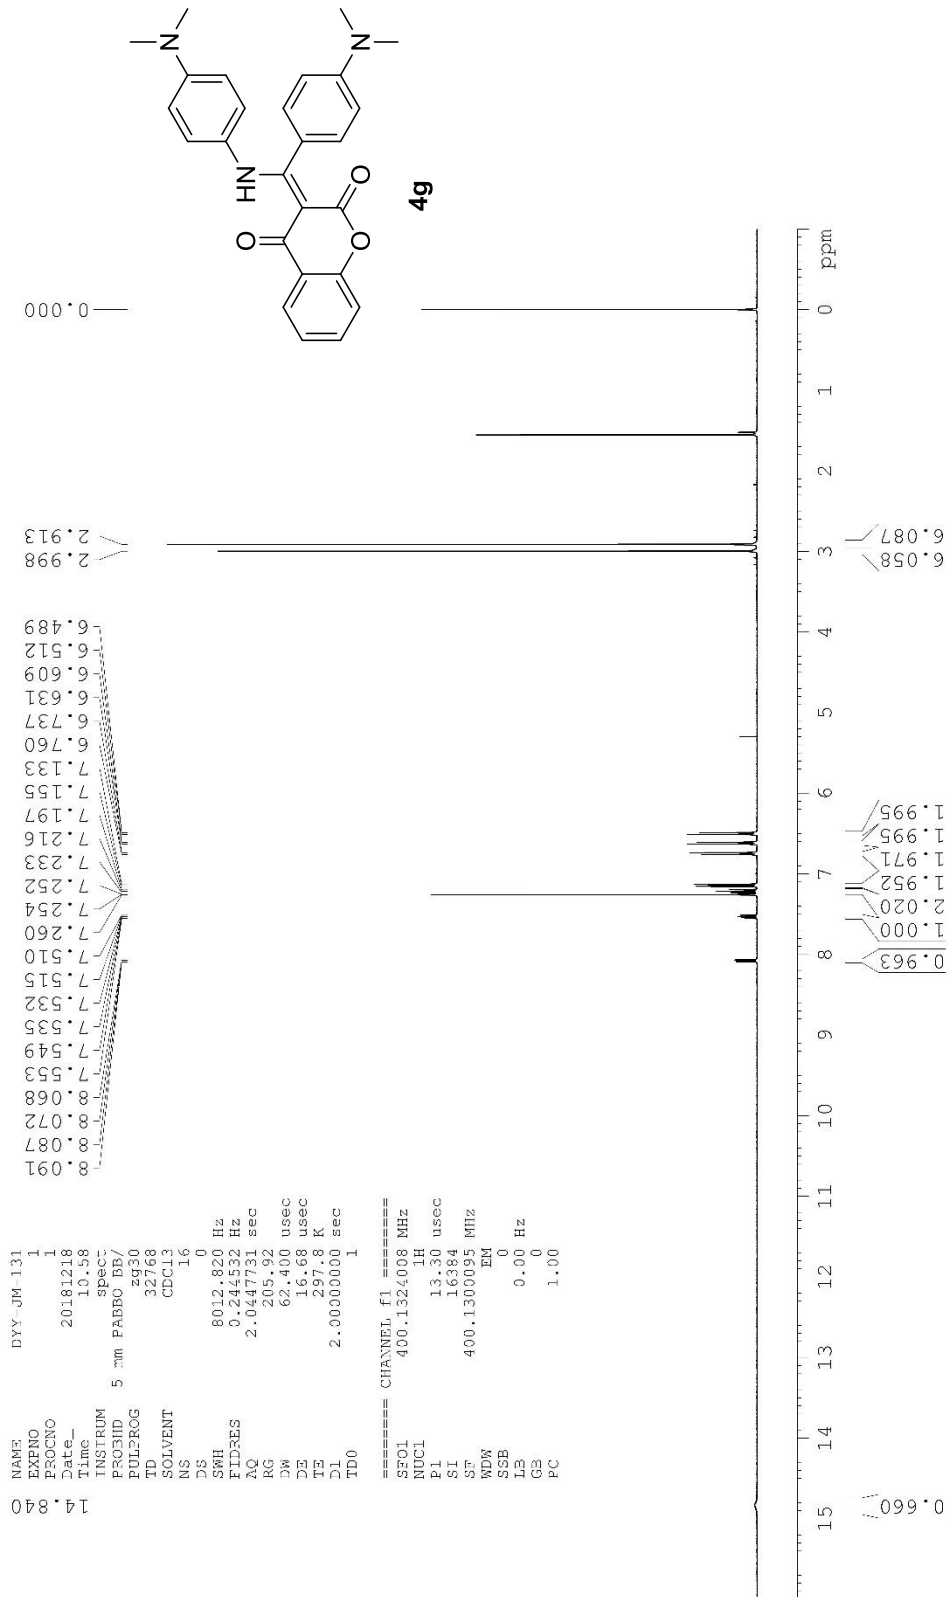



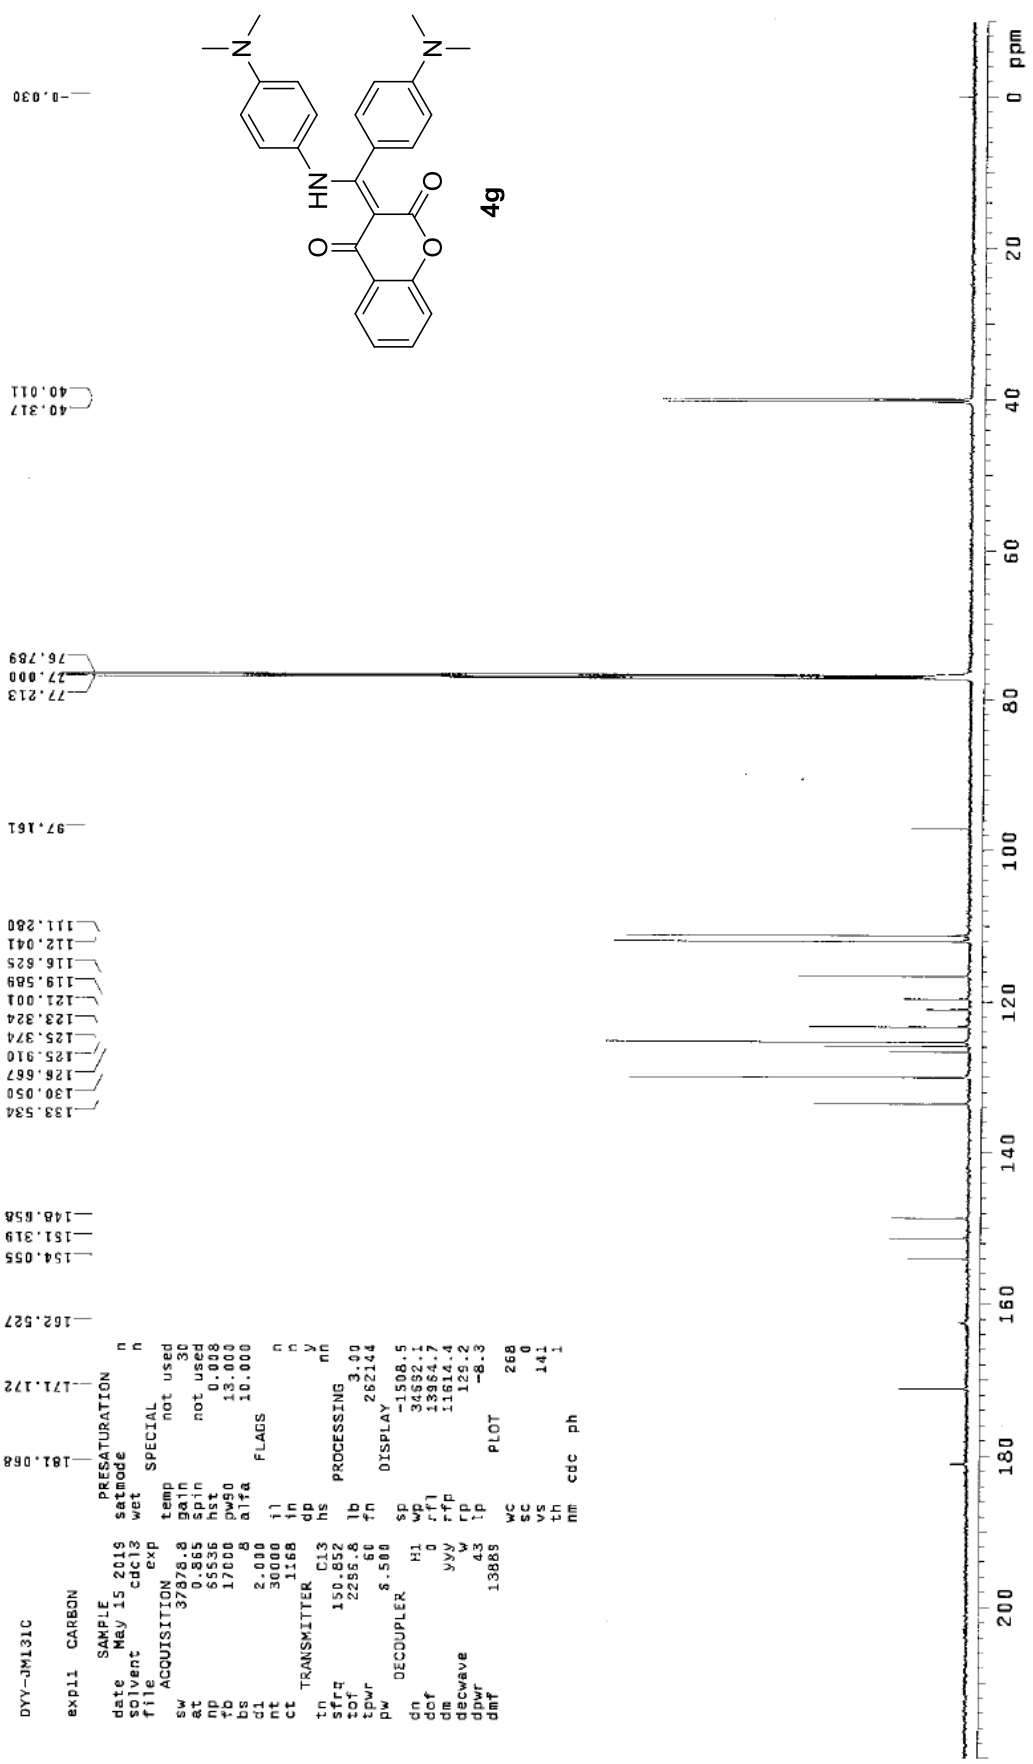

```

DYY-JM131C
EXP11 CARBON
SAMPLE
date May 15 2019
solvent cdc13
file cdc13
PRESATURATION n
satmode wet
SPECIAL n
temp not used
sw 37878.8 gain 30
at 0.865 spin not used
np 55536 hst 0.008
fb 17000 pws0 13.000
bs 8 alpha
dl 2.000
nt 30000 fl
ct 1168 in n
tn C13 hs
sfff 150.852
tof 2285.8 lb PROCESSING nn
tpwr 60 fn DISPLAY 282144
pw DECOUPLER 8.500 sp -1508.5
dn H1 wp 34852.1
dof 0 ffl 13864.7
dm yyy rfp 11614.4
decwave w tp 125.2
dpr 43 ip -8.3
dmf 13885 WC 268
VC 141
VS 141
tn hh cdc ph
  
```

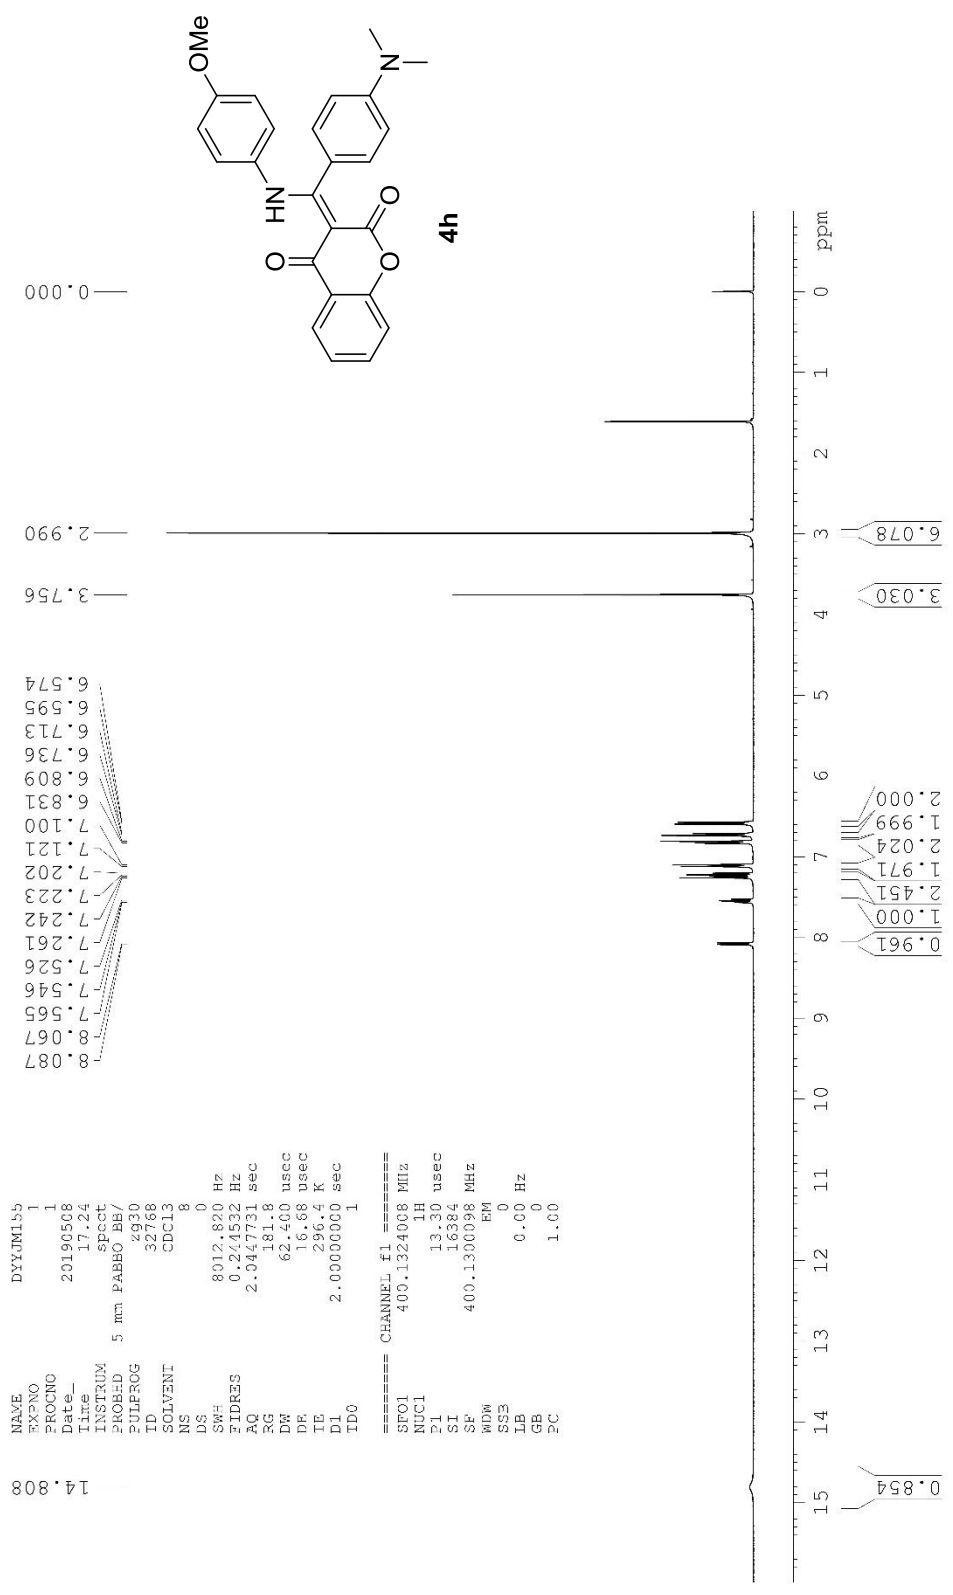

NAME DYJUM155  
 EXPNO 1  
 PROCNO 1  
 Date\_ 20190508  
 Time 17.24  
 INSTRUM spect  
 PROBEID 5 mm PABBO BB/  
 PULPROG zg30  
 ID 32768  
 SOLVENT CDCl3  
 NS 8  
 DS 0  
 SWH 8012.820 Hz  
 FIDRES 0.244532 Hz  
 AQ 2.0447731 sec  
 RG 181.8  
 DM 62.600 usec  
 DE 16.88 usec  
 TE 296.4 K  
 DI 2.00000000 sec  
 ID0 1  
 ===== CHANNEL f1 =====  
 SF01 400.1324008 MHz  
 NUC1 1H  
 P1 13.30 usec  
 SI 16384  
 SF 400.1300098 MHz  
 WDM FM  
 SSB 0  
 LB 0.00 Hz  
 GB 0  
 DE 1.00

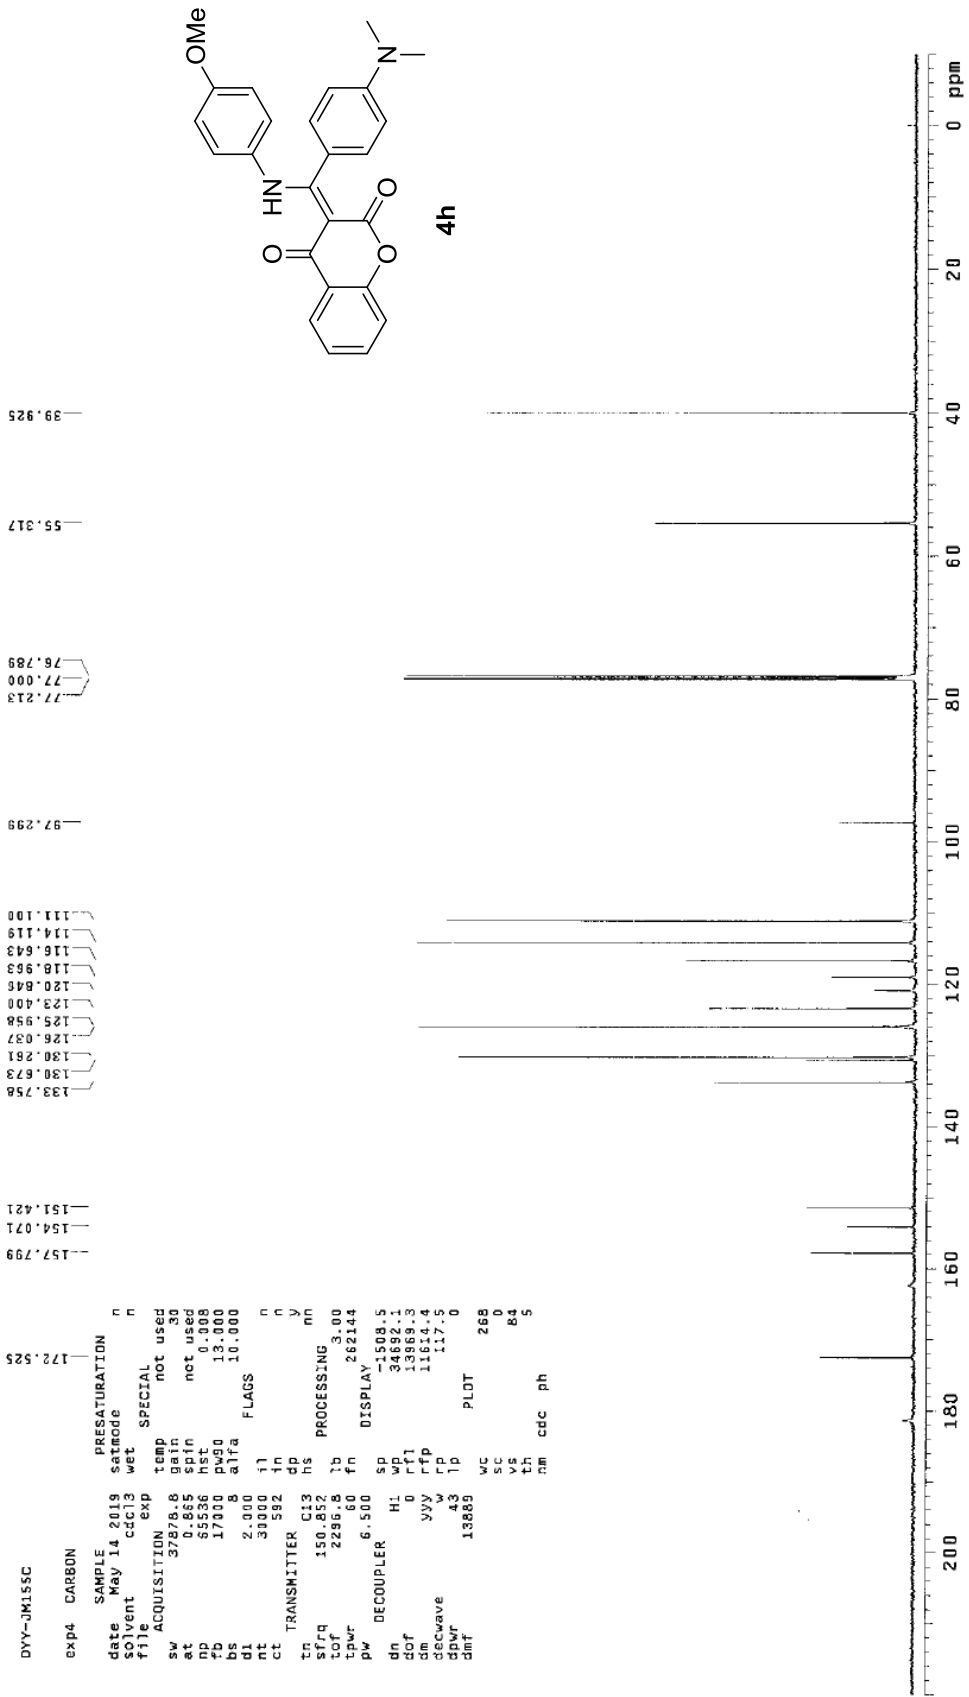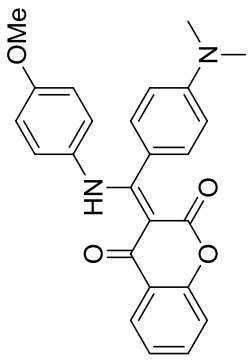

```

DYY-JM155C
exp4 CARBON
SAMPLE PRESATURATION
date May 14 2019 satmode n
solvent cdc13 wet SPECIAL n
file
ACQUISITION exp TEMP not used
sw 37879.8 gain 30
at 0.665 spin not used
pp 5536 hst 0.008
td 17000 psg0 13.000
ds 8 alpha 10.000
qt 31000 i1
ct 592 i1 n
CT TRANSMITTER C13 dd Y
sfFq 150.852 hs PROCESSING nn
tof 2285.8 fb 3.00
tpwf 60 fn DISPLAY 282144
pw 6.500 sp
dn DECOUPLER H1 wd -1508.5
dof 0 rf1 34692.1
dm vvy rfp 13869.3
decWave w rfp 11514.4
dmf 3 rfp 117.5
dmf 18883 tp PLOT 0
WC 268
SC 0
VS 84
th nm cdc ph 5
  
```

```

NAME          DIY-JN-154
EXPNO         1
PROCNO        1
Date_         20190514
Time         11.12
INSTRUM       spect
PROBHD        5 mm PABBO BB/
PULPROG       zgpg30
TD            32768
SOLVENT       CDCl3
NS            16
DS            0
SWH           8012.820 Hz
FIDRES       0.244532 Hz
AQ           2.0447731 sec
RG           205.92
DN           62.400 usec
DE           16.68 usec
TE           297.3 K
D1           2.00000000 sec
D10          1
===== CHANNEL f1 =====
SFO1         400.1324008 MHz
NUC1         1H
P1           13.30 usec
SI           16384
SF           400.1300091 MHz
WDW          EV
SSB          0
LB           0.00 Hz
GB           0
PC           1.00

```

```

8.079
8.060
7.584
7.581
7.563
7.545
7.542
7.341
7.319
7.270
7.261
7.251
7.229
7.207
7.112
7.091
6.764
6.743
6.601
6.580

```

```

3.011
0.000

```

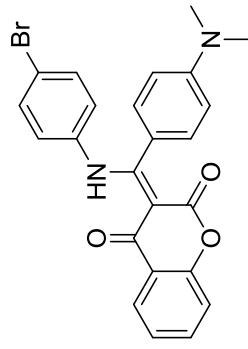

4i

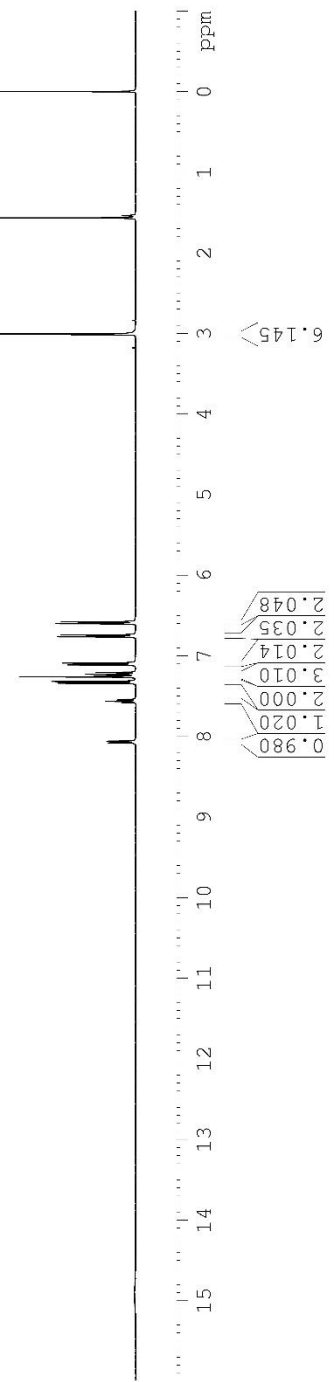

OYY-JM154C  
 exp3 CARBON  
 SAMPLE PRESATURATION  
 date May 14 2013 satmode n  
 solvent cdc13 wet  
 file SPECIAL  
 ACQUISITION exp temp not used  
 sw 37278.8 gain 30  
 at 6592 spin not used  
 ff 17000 nu 13.000  
 bs 8 pfs 10.000  
 dl 2.000 fl  
 ct 30000 fl n  
 448 in n  
 TRANSMITTER C13 dp V  
 tn 150.852 hs  
 sffrq 2295.8 lb PROCESSING nn  
 tof 60 fn DISPLAY  
 26214  
 pw 6.500 sp  
 DECOUPLER H1 WP -1508.5  
 dn 0 rft 34692.1  
 dm 0 rfp 13969.3  
 decwave w rp 11614.4  
 dpr 43 lp 112.9  
 dmf 13859 WC PLOT 268  
 VC  
 VS 84  
 TH 3  
 nmr cdc ph

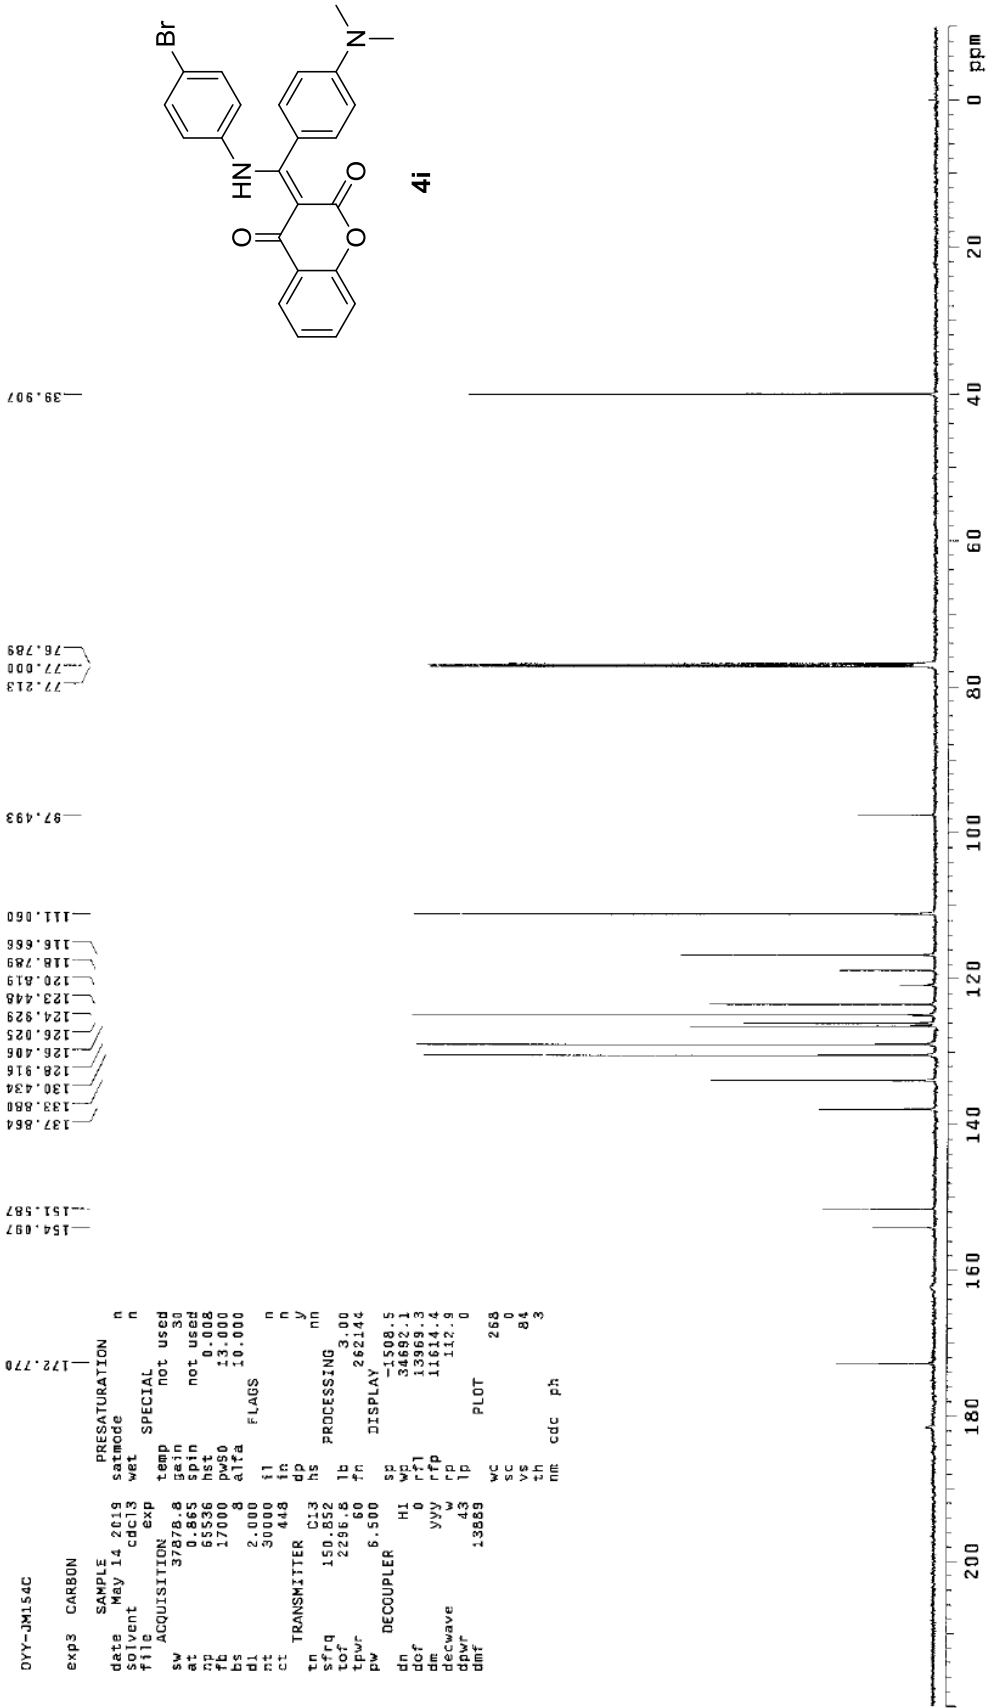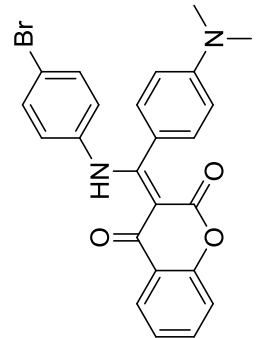

```

NAME          DYY-JM-150
EXPNO         1
PROCNO        1
Date_         20190109
Time         11.11
INSTRUM       spect
PROBHD        5 mm PABBO BB/
PULPROG       zg30
TD            32768
SOLVENT       CDCl3
NS            16
DS            0
SWH           8012.820 Hz
FIDRES       0.244532 Hz
AQ           2.0447731 sec
RG           205.92
DW           62.400 usec
DE           16.68 usec
TE           298.6 K
D1           2.00000000 sec
TD0          1
===== CHANNEL f1 =====
SFO1         400.1324008 MHz
NUC1         1H
P1           13.30 usec
SI           16384
SF           400.1300091 MHz
WDW          EM
SSB          0
LB           0.00 Hz
GB           0
PC           1.00

```

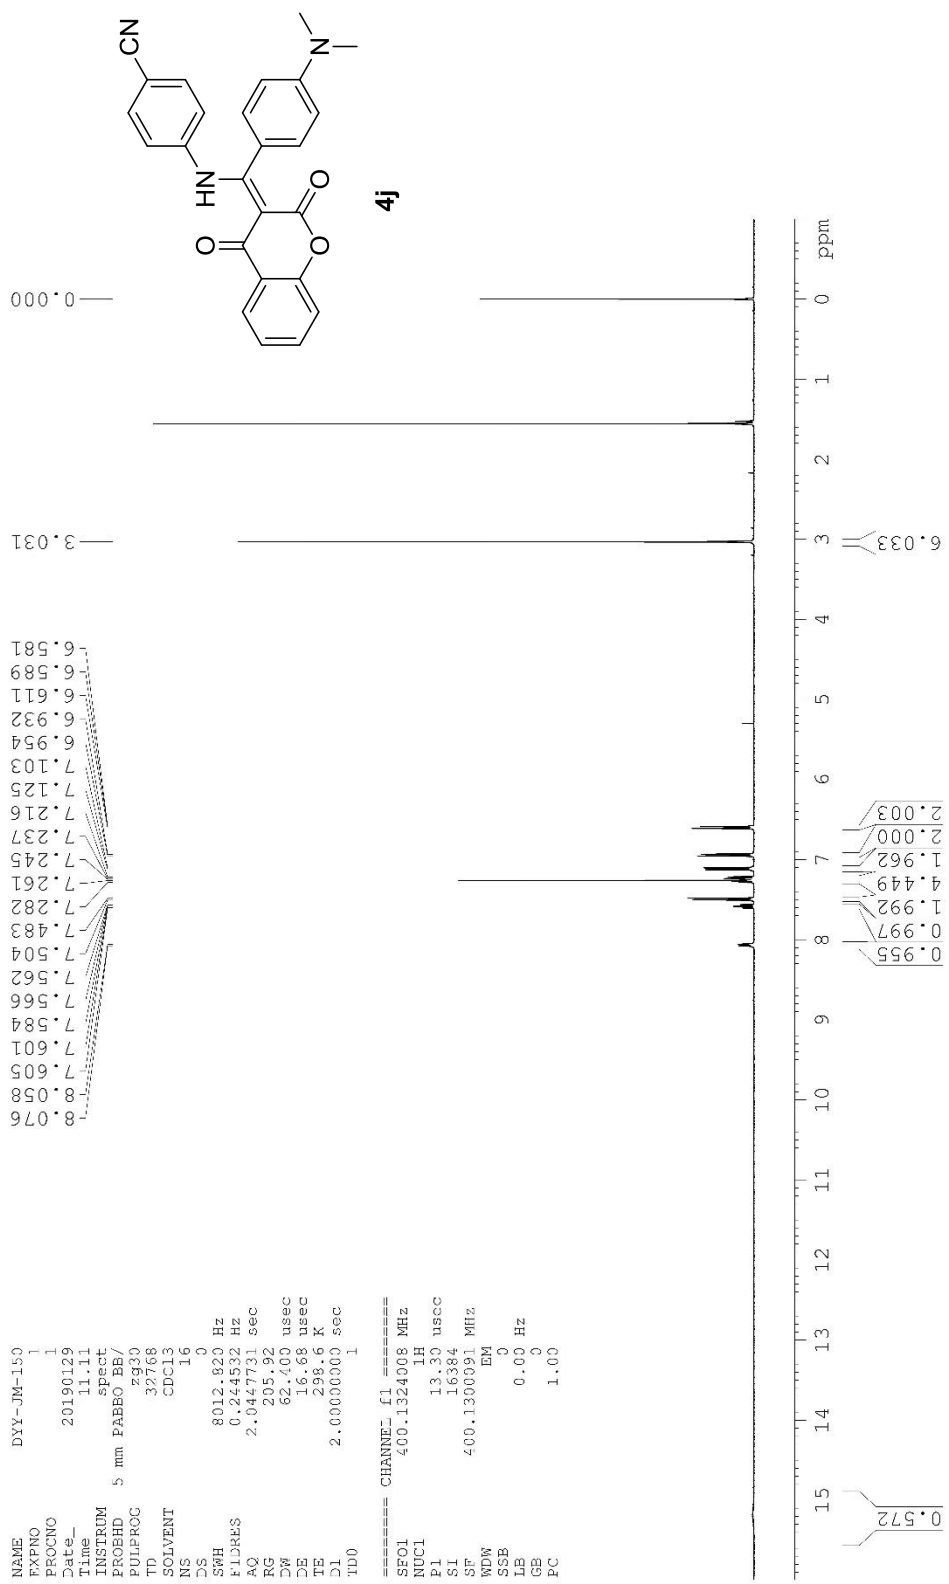

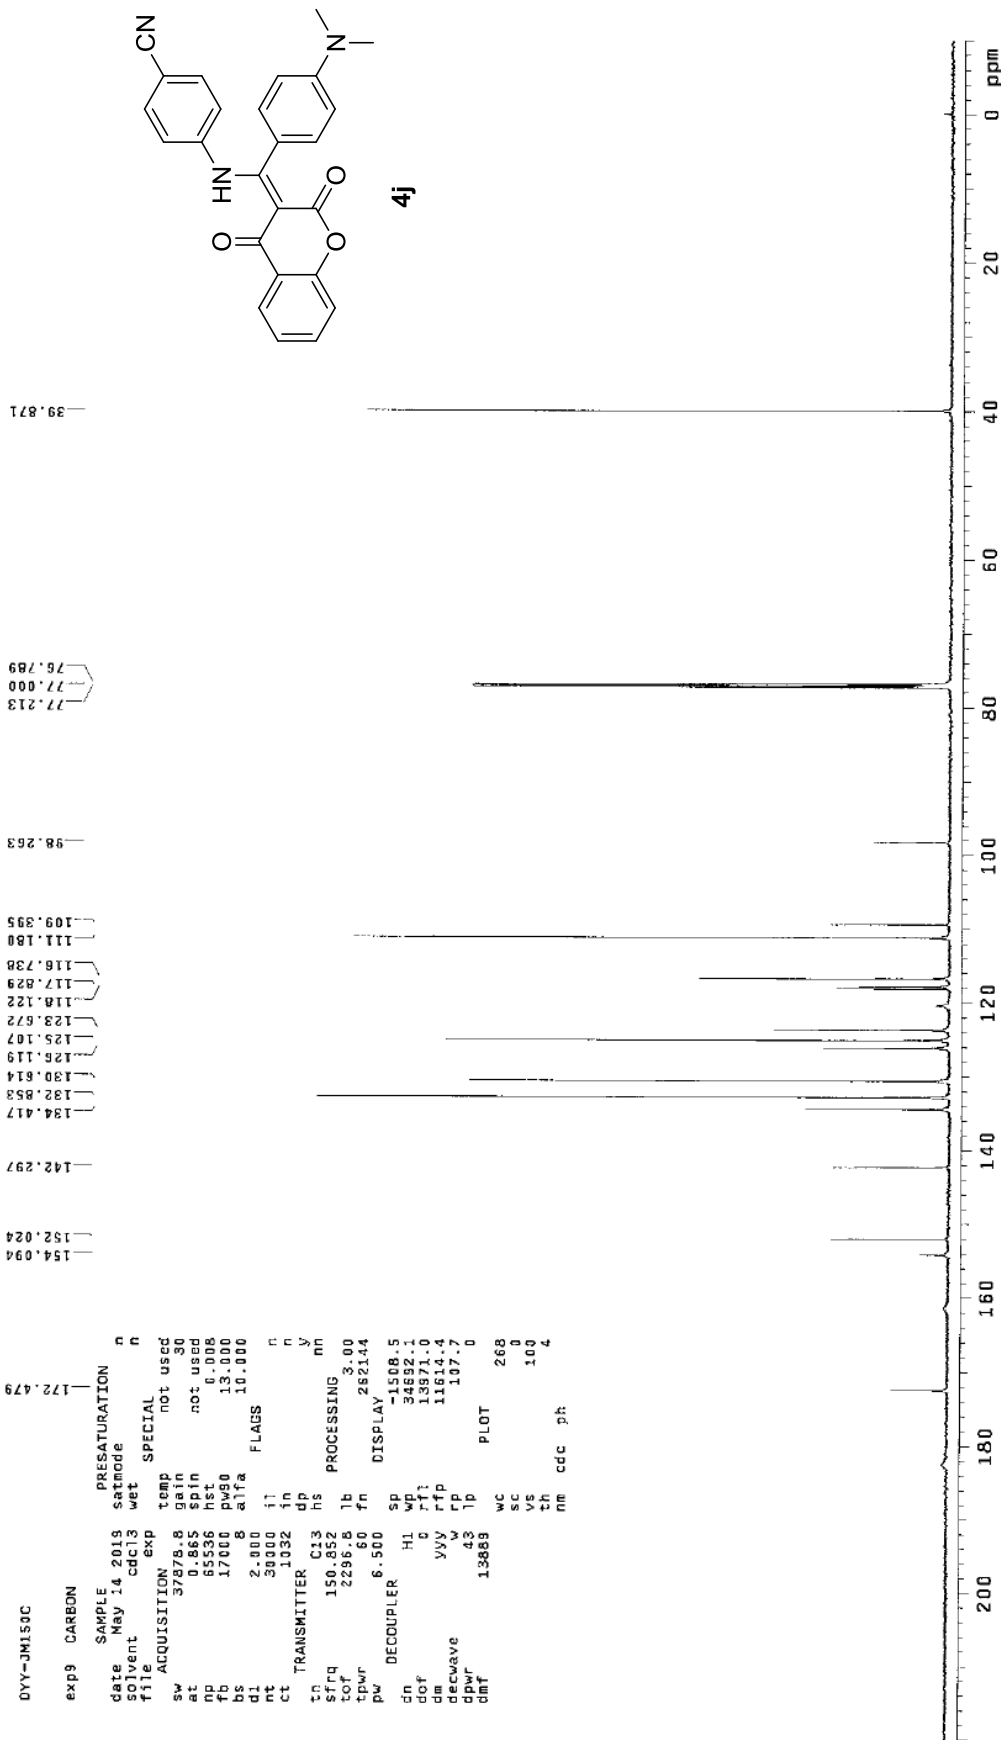

NAME DYJUN160  
 EXPNO 1  
 PROCNO 20190508  
 Date\_ 17.39  
 Time\_ 17.39  
 INSTRUM spect  
 PROBHD 5 mm PABBO BB/  
 PULPROG zg30  
 TD 32768  
 SOLVENT CDCl3  
 NS 8  
 DS 0  
 SMH 8012.820 Hz  
 FIDRES 0.244632 Hz  
 AQ 2.0447731 sec  
 RG 205.92  
 DW 62.400 usec  
 DE 16.68 usec  
 TE 296.4 K  
 D1 2.00000000 sec  
 TDC 1

===== CHANNEL f1 =====  
 SFOL 400.1324008 MHz  
 NUCL 1H  
 P1 13.30 usec  
 SI 16384  
 SF 400.1300092 MHz  
 EM  
 SSB 0  
 LB 0.00 Hz  
 GB 0  
 PC 1.00

8.126  
 8.107  
 7.589  
 7.570  
 7.492  
 7.472  
 7.302  
 7.283  
 7.262  
 7.224  
 7.204  
 7.178  
 7.125  
 7.105  
 6.872  
 6.853

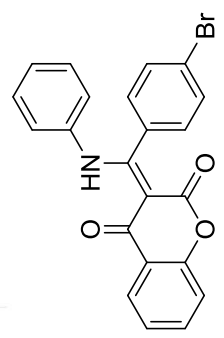

4k

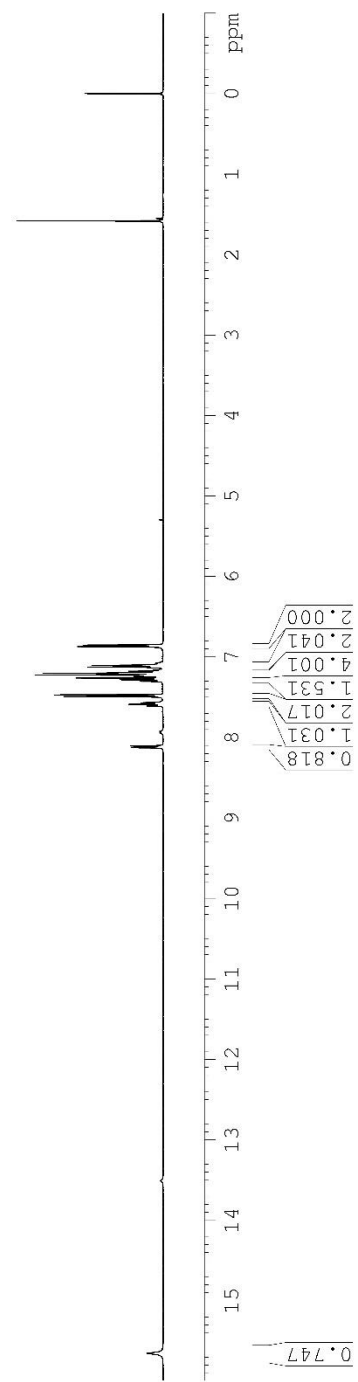



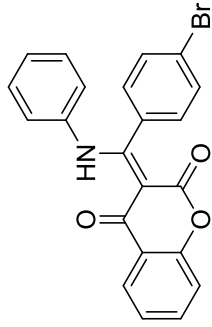

4k

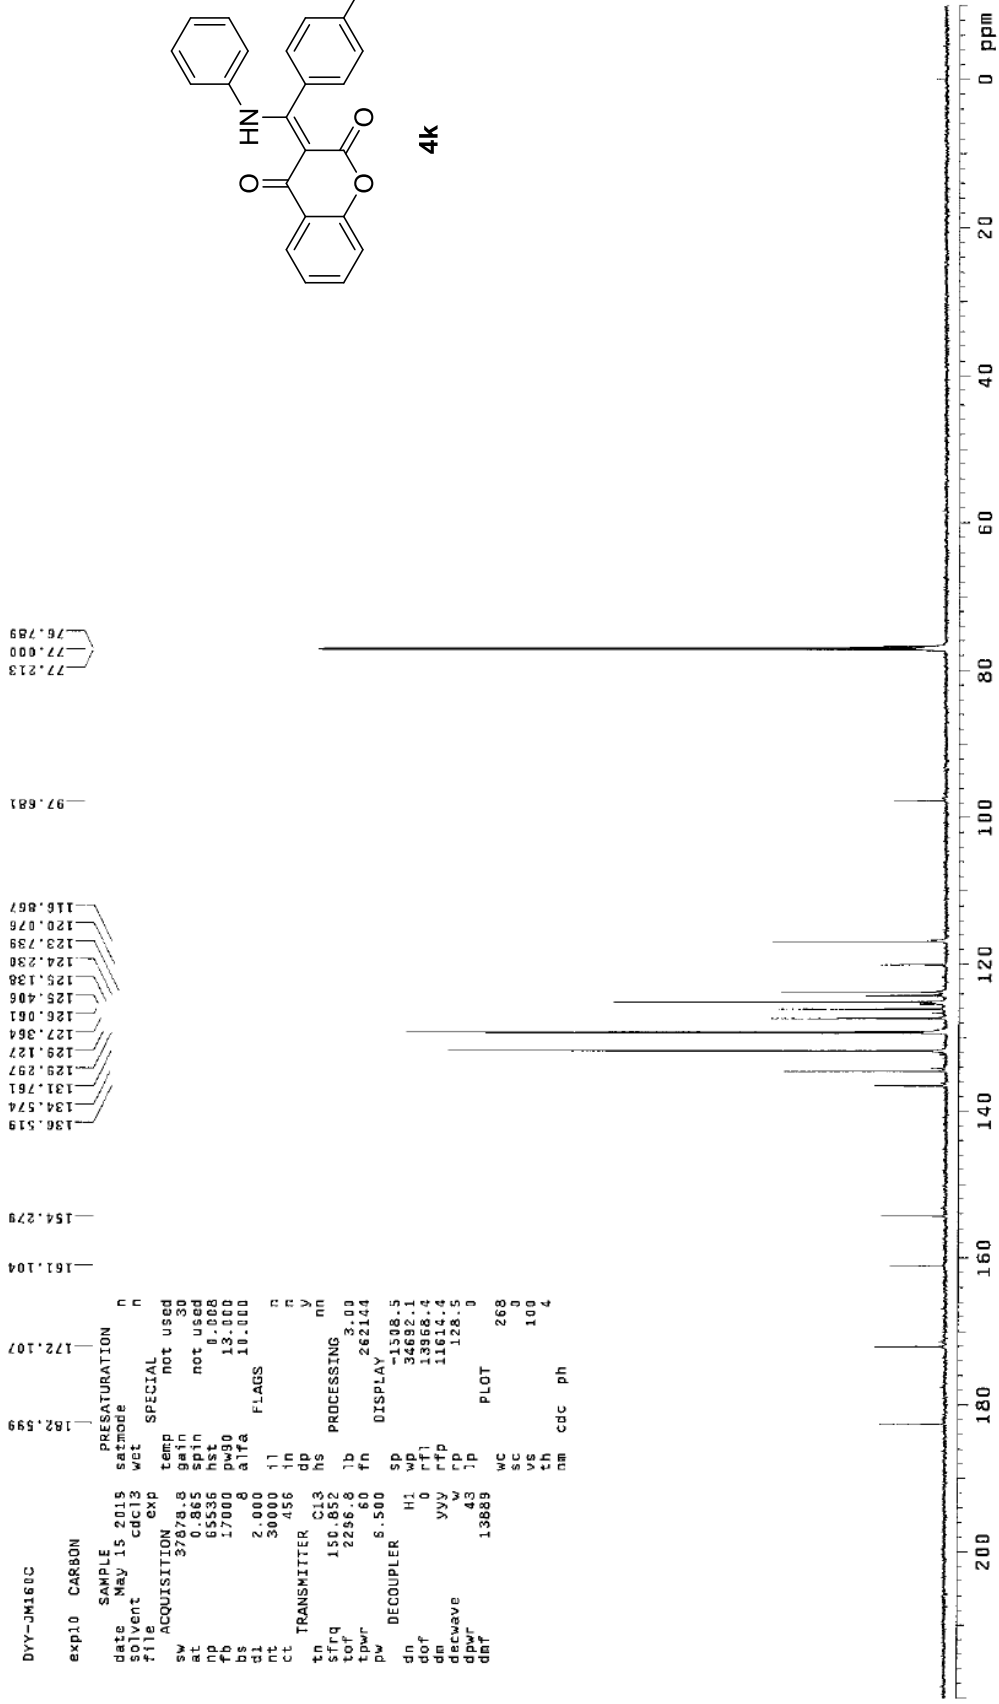

```

DVI-JM161C
exp10 CARBON
date May 15 2015
solvent cdc13
file cdc13
PRESATURATION n
wet SPECIAL n
ACQUISITION exp temp not used
sw 37878.8 gain 30
at 0.263 spin not used
pp 0.5536 nst 0.008
ss 17000 psg 15.000
cs 2.000 aifa 10.000
qt 30000 fl
ct 30456 in
TRANSMITTER c13
tn 150.852 ns
sfrq 2256.8 fb PROCESSING nm
tof 60 fn DISPLAY 262144
pw 5.500 SP -1308.5
dn H1 wd 34692.1
dof 0 rfl 13868.4
dn vvy rfp 11614.4
decsave w cp 128.5
dpr 43 ip PLOT
dnf 13889 WC 268
SC 100
VS 100
th cdc ph 4
  
```

NAME DYYJMI61  
 EXPNO 1  
 PROCNO 1  
 Date\_ 20190508  
 Time\_ 17.47  
 INSTRUM spect  
 PROBED 5 mm PABBO BB/  
 PULPROG zg30  
 ID 32768  
 SOLVENT CDCl3  
 NS 16  
 DS 0  
 SWH 8012.820 Hz  
 FIDRES 0.244532 Hz  
 AQ 2.0447731 sec  
 RG 205.92  
 DW 62.400 usec  
 DE 16.68 usec  
 TE 296.4 K  
 D1 2.0000000 sec  
 TD0 1

===== CHANNEL f1 =====  
 SF01 400.1324008 MHz  
 NUC1 1H  
 P1 13.30 usec  
 SI 16384  
 SF 400.1300082 MHz  
 EM  
 SSB 0  
 LB 0  
 GB 0  
 PC 1.00

8.216  
 8.195  
 8.147  
 8.127  
 7.635  
 7.616  
 7.598  
 7.434  
 7.413  
 7.381  
 7.329  
 7.310  
 7.292  
 7.262  
 7.236  
 7.224  
 7.206  
 6.891  
 6.873

15.746

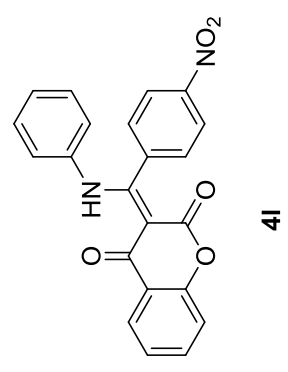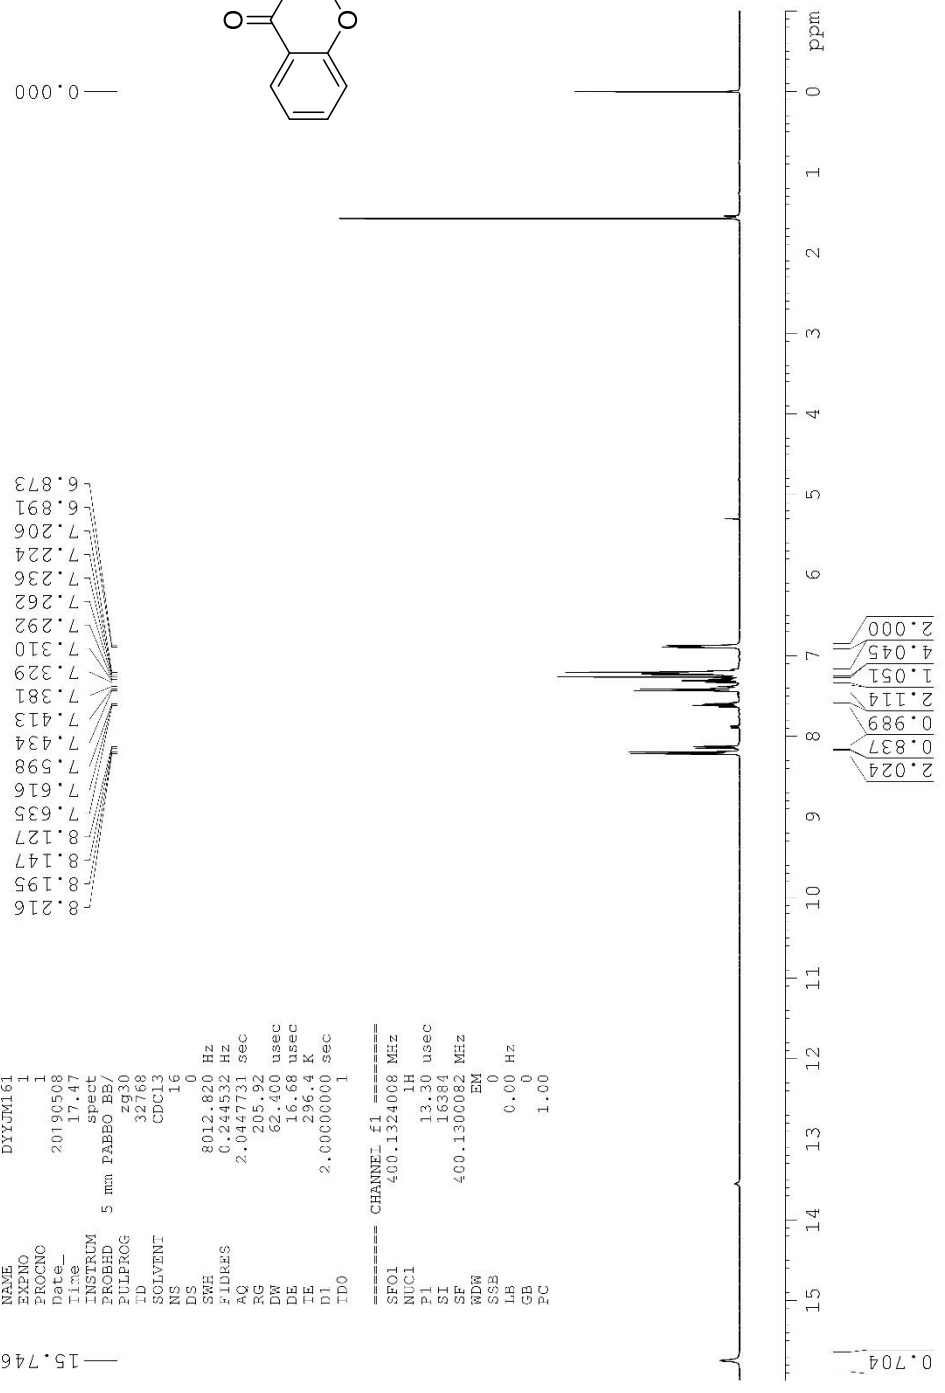

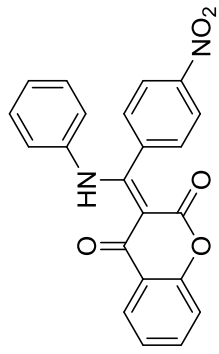

41

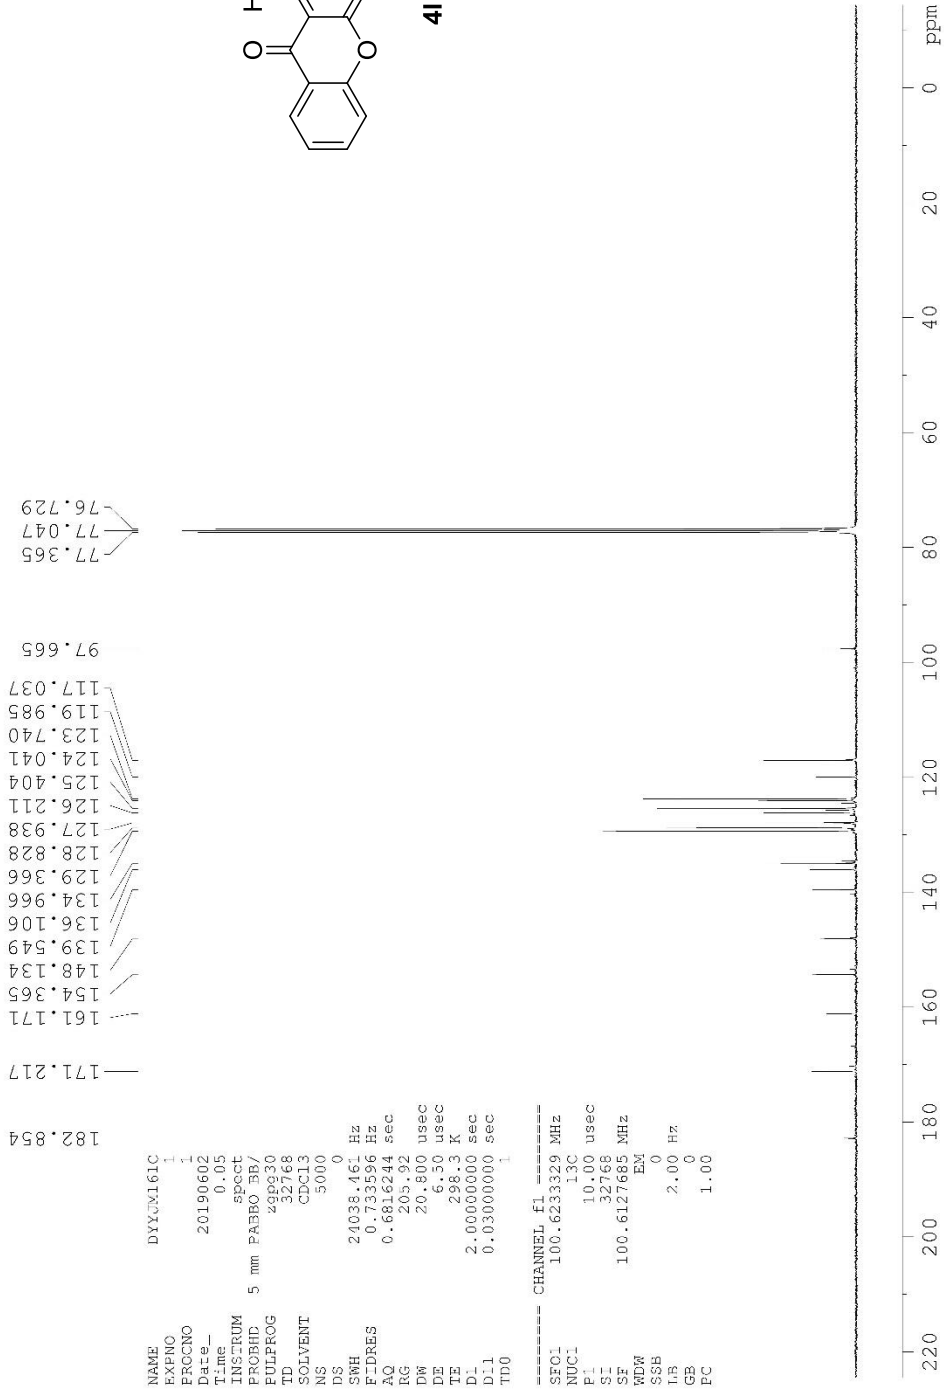

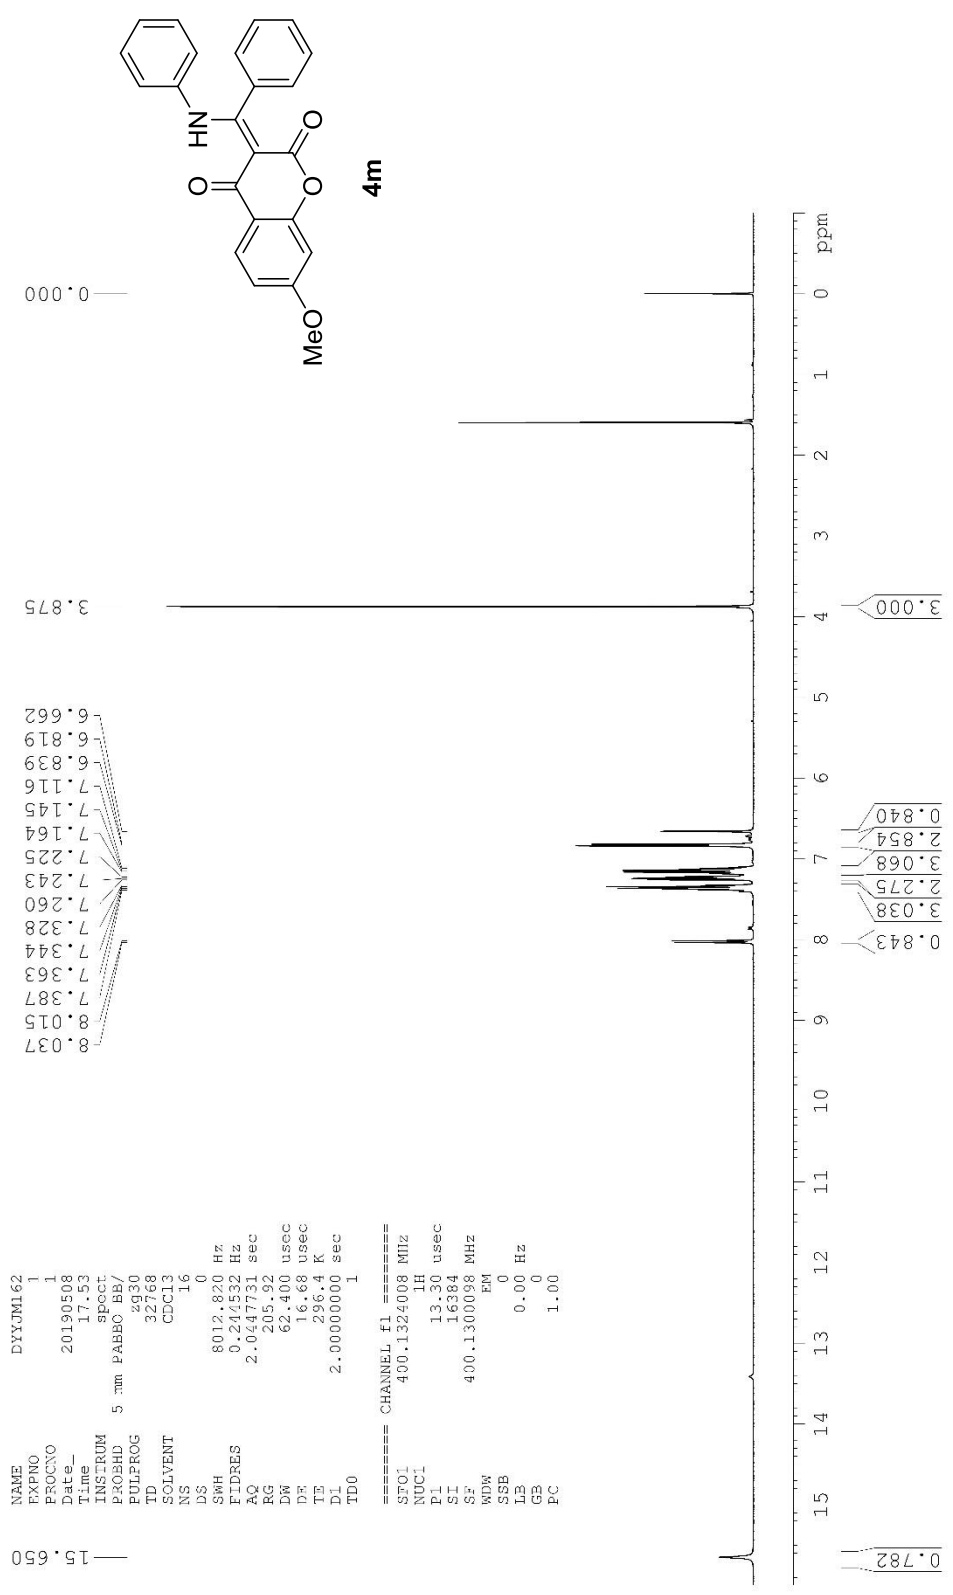

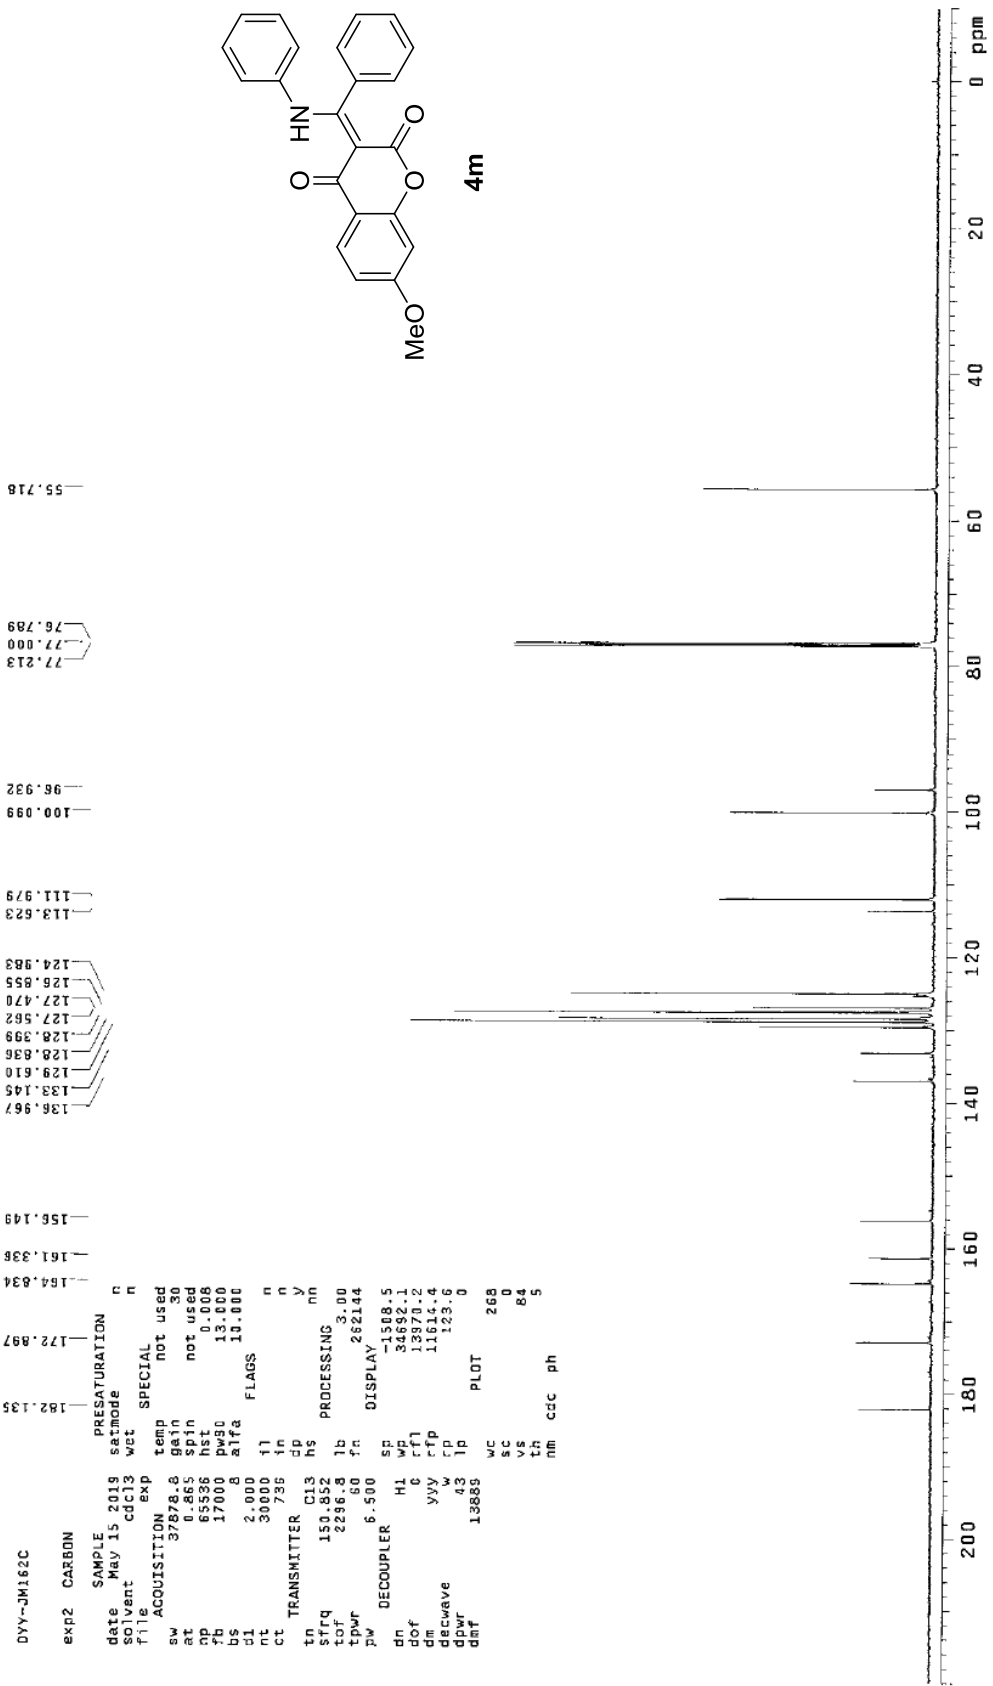

```

DYY-JM162C
exp2 CARBON
date SAMPLE PRESATURATION n
  May 15 2019 satmode
file cdc13 wet SPECIAL n
sw ACQUISITION exp temp not used
  37878.8 gain
at 0.865 sp in not used
pp 65538 hst 0.008
zb 17000 pw3c 13.000
bs 8 x1fa 10.000
d1 2.000
nt 30000 f1
ct 735 in n
tn TRANSMITTER C13 hs
  150.852 PROCESSING nm
tof 2286.8 lb 3.00
tpwr 60 fn 262144
pw DECOUPLER 6.500 SP
  -1508.5
  H1 wp 34682.1
  C rf1 13970.2
  VVY rfp 11614.4
  43 tp 123.6
  0
dnt 13883 WC PLOT 268
  SC 0
  VS 84
  TH 5
nm cdc ph
  
```

8.075  
7.516  
7.495  
7.402  
7.384  
7.371  
7.353  
7.335  
7.259  
7.237  
7.219  
7.188  
7.169  
7.147  
6.860  
6.841

15.547  
NAME DYYJMI63  
EXPNO 1  
PROCNO 1  
Date\_ 20190508  
Time 18.00  
INSTRUM spect  
PROBHD 5 mm PABBOEB/  
PULPROG zg30  
TD 32768  
SOLVENT CDCl3  
NS 16  
DS 0  
SWH 8012.820 Hz  
FIDRES 0.244532 Hz  
AQ 2.0447731 sec  
RG 205.92  
DW 62.400 usec  
DE 16.68 usec  
TE 296.4 K  
D1 2.00000000 sec  
ID0 1

----- CHANNEL f1 -----  
SFO1 400.1324008 MHz  
NUC1 1H  
P1 13.30 usec  
SI 16384  
SF 400.1300103 MHz  
WDW EM  
SSB 0  
LB 0.00 Hz  
GB 0  
PC 1.00

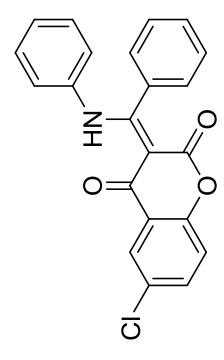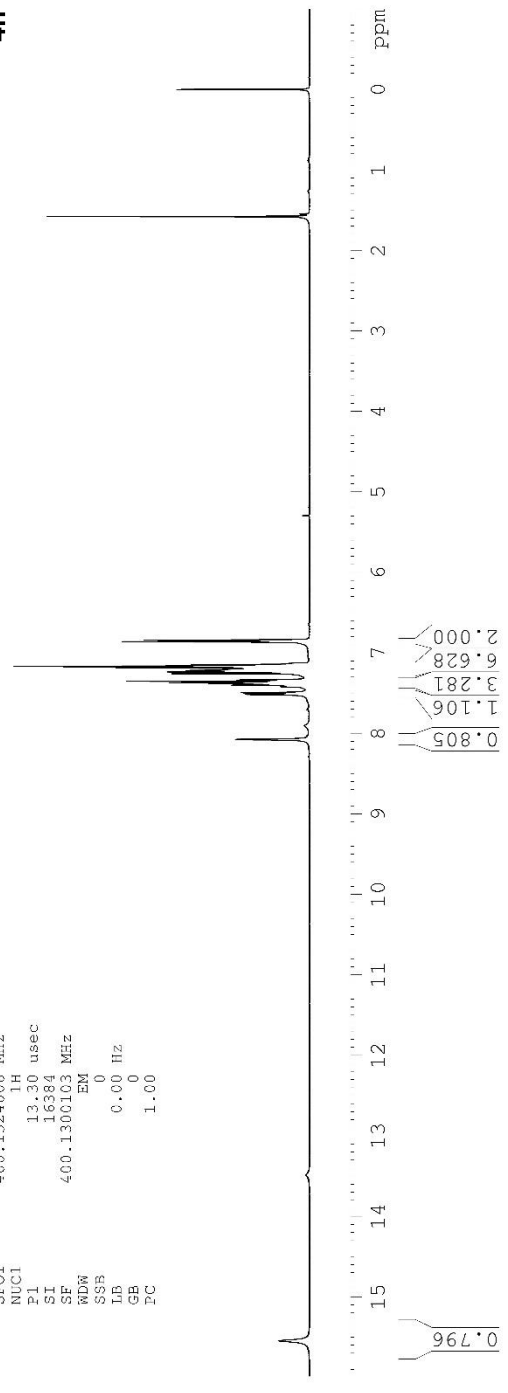

DVY-QM163C

exp5 CARBON

```

SAMPLE
date      May 14 2019
file      cdc13
solvent   wet
PRESATURATION
wet       SPECIAL
temp      not used
acq      37878.8
at        0.865
ns        55535
nb        17000
bs        13.000
dl        2.000
nt        30000
ct        672
IN
transmitter C13
sfreq      150.852
tof        2286.8
tpwr      60
pw         6.500
DECOUPLER
dn         H1
dof        6
dm         yyf
decwave    w
dpr        43
dmf        13889
wc         268
sc         0
vs         113
tn         0
nm         cdc
ph         3

```

181.290 173.454 160.606 152.722

136.849 134.265 132.742 129.699 129.213 128.981 128.506 127.527 127.301 125.584 125.071 121.305 118.472

97.589

77.213 77.000 76.789

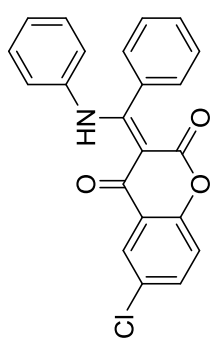

4n

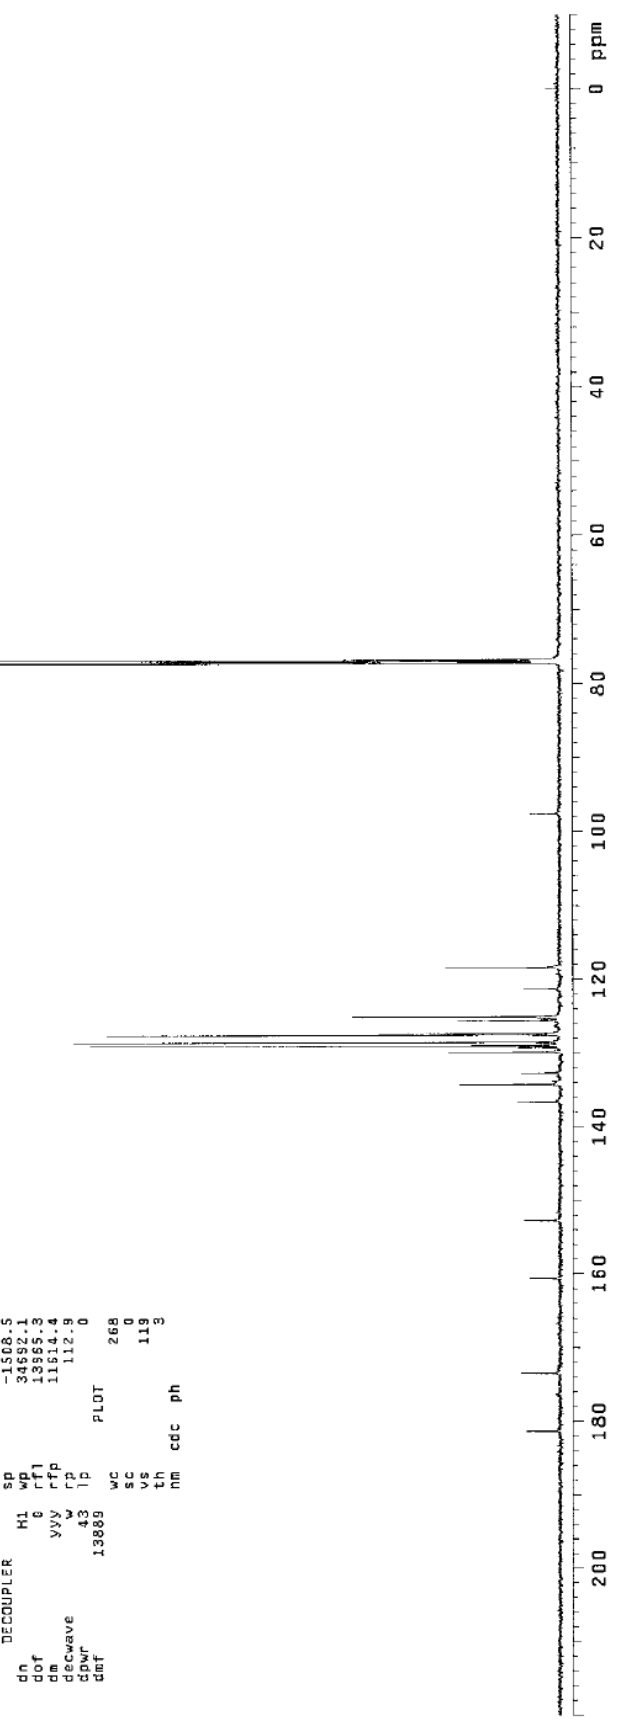

BMK-5-920-2

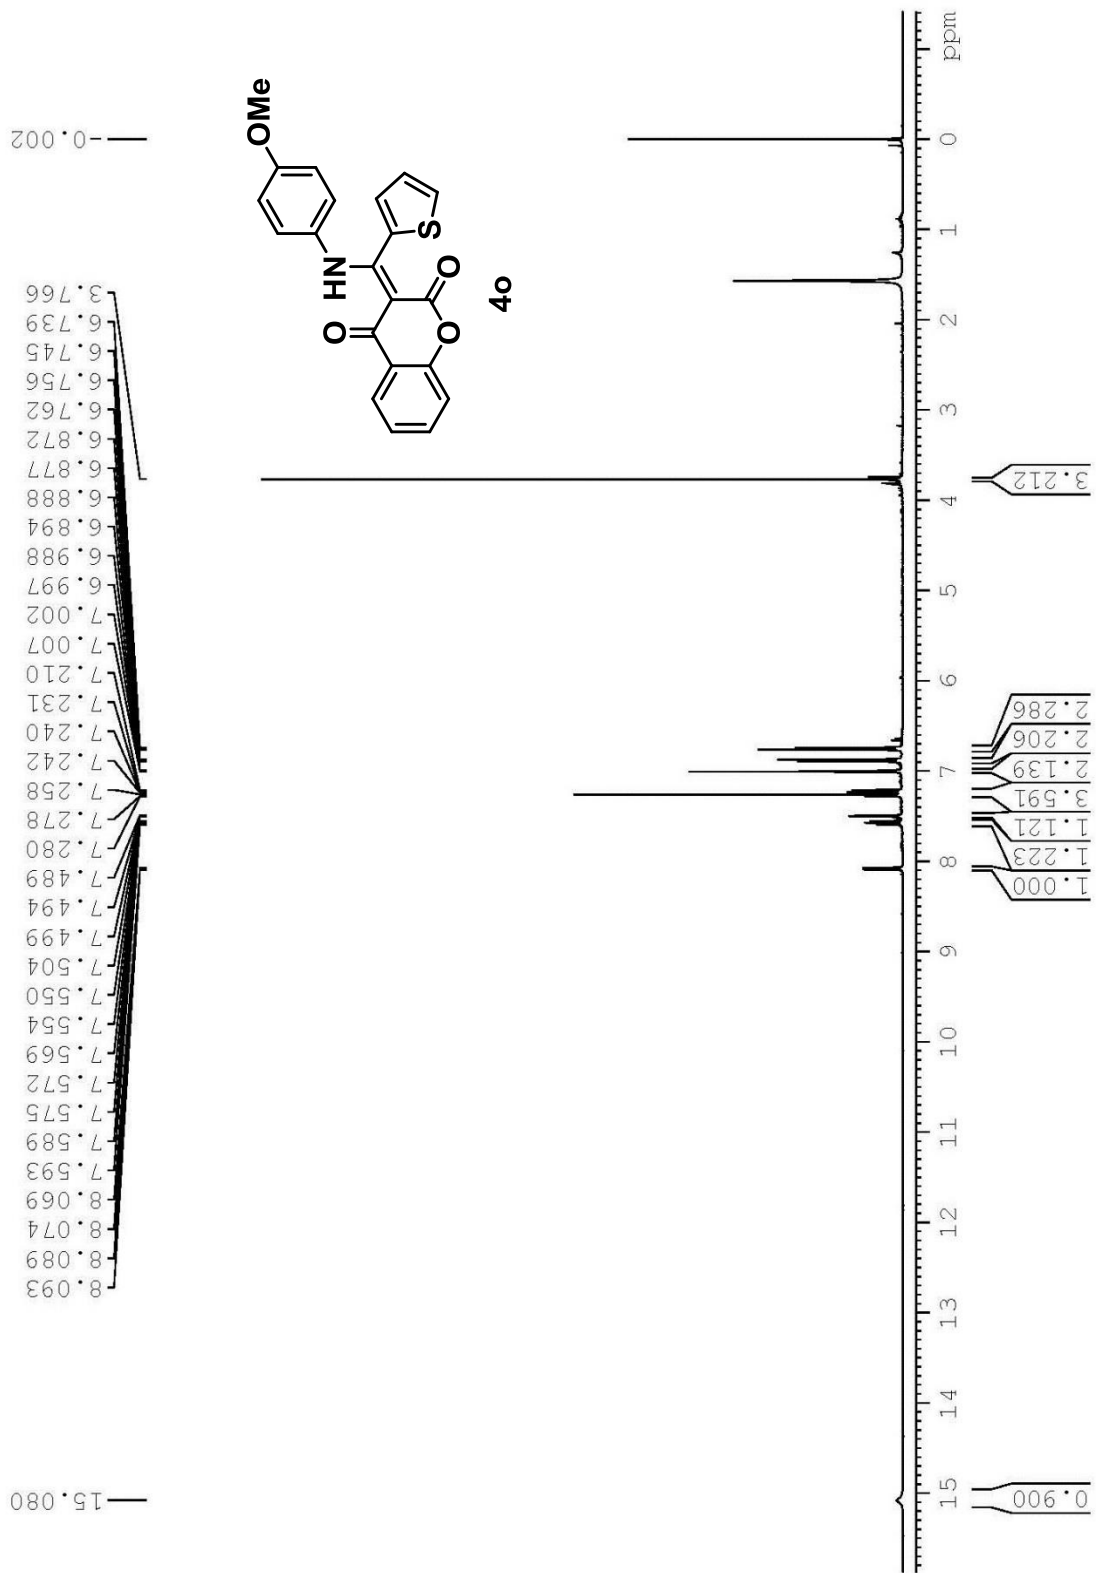



BMK-5-920-C

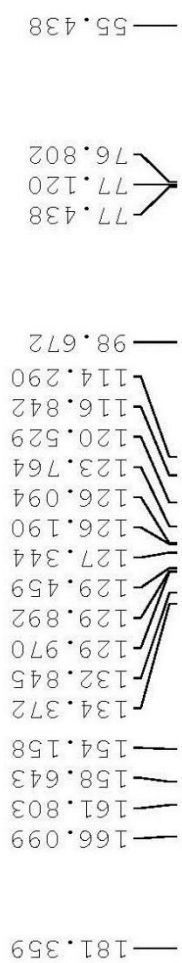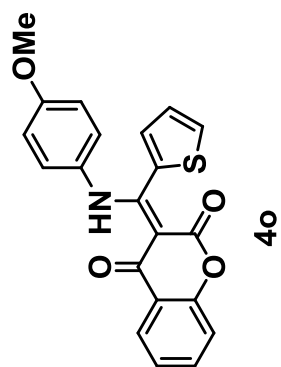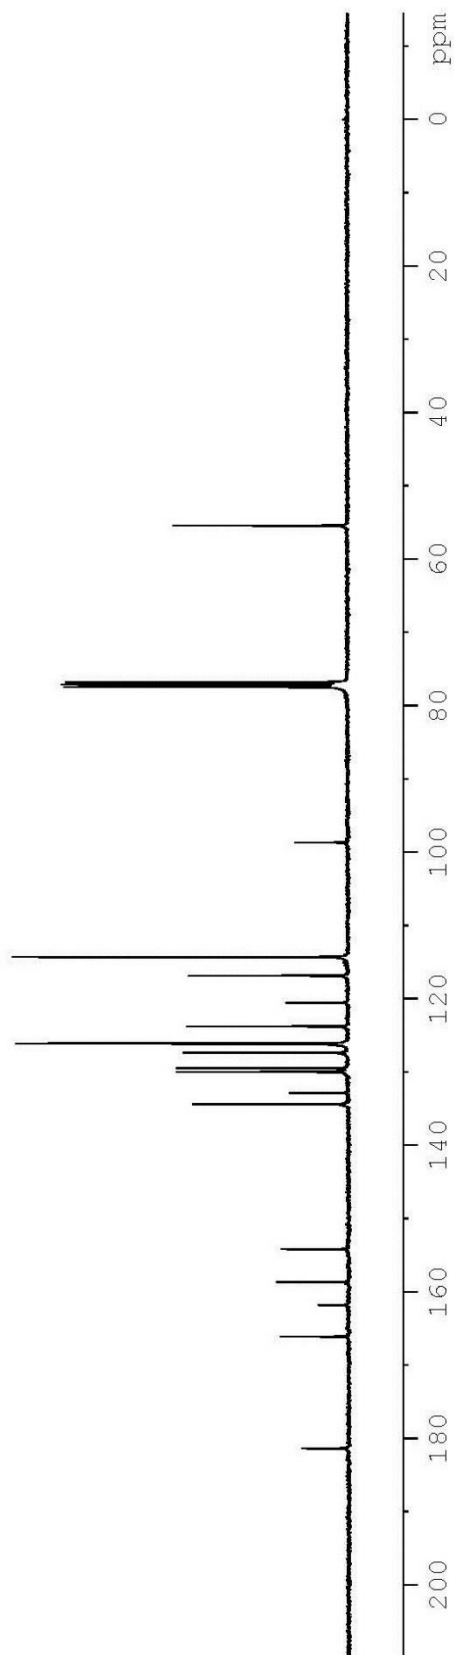

BMK-5-914

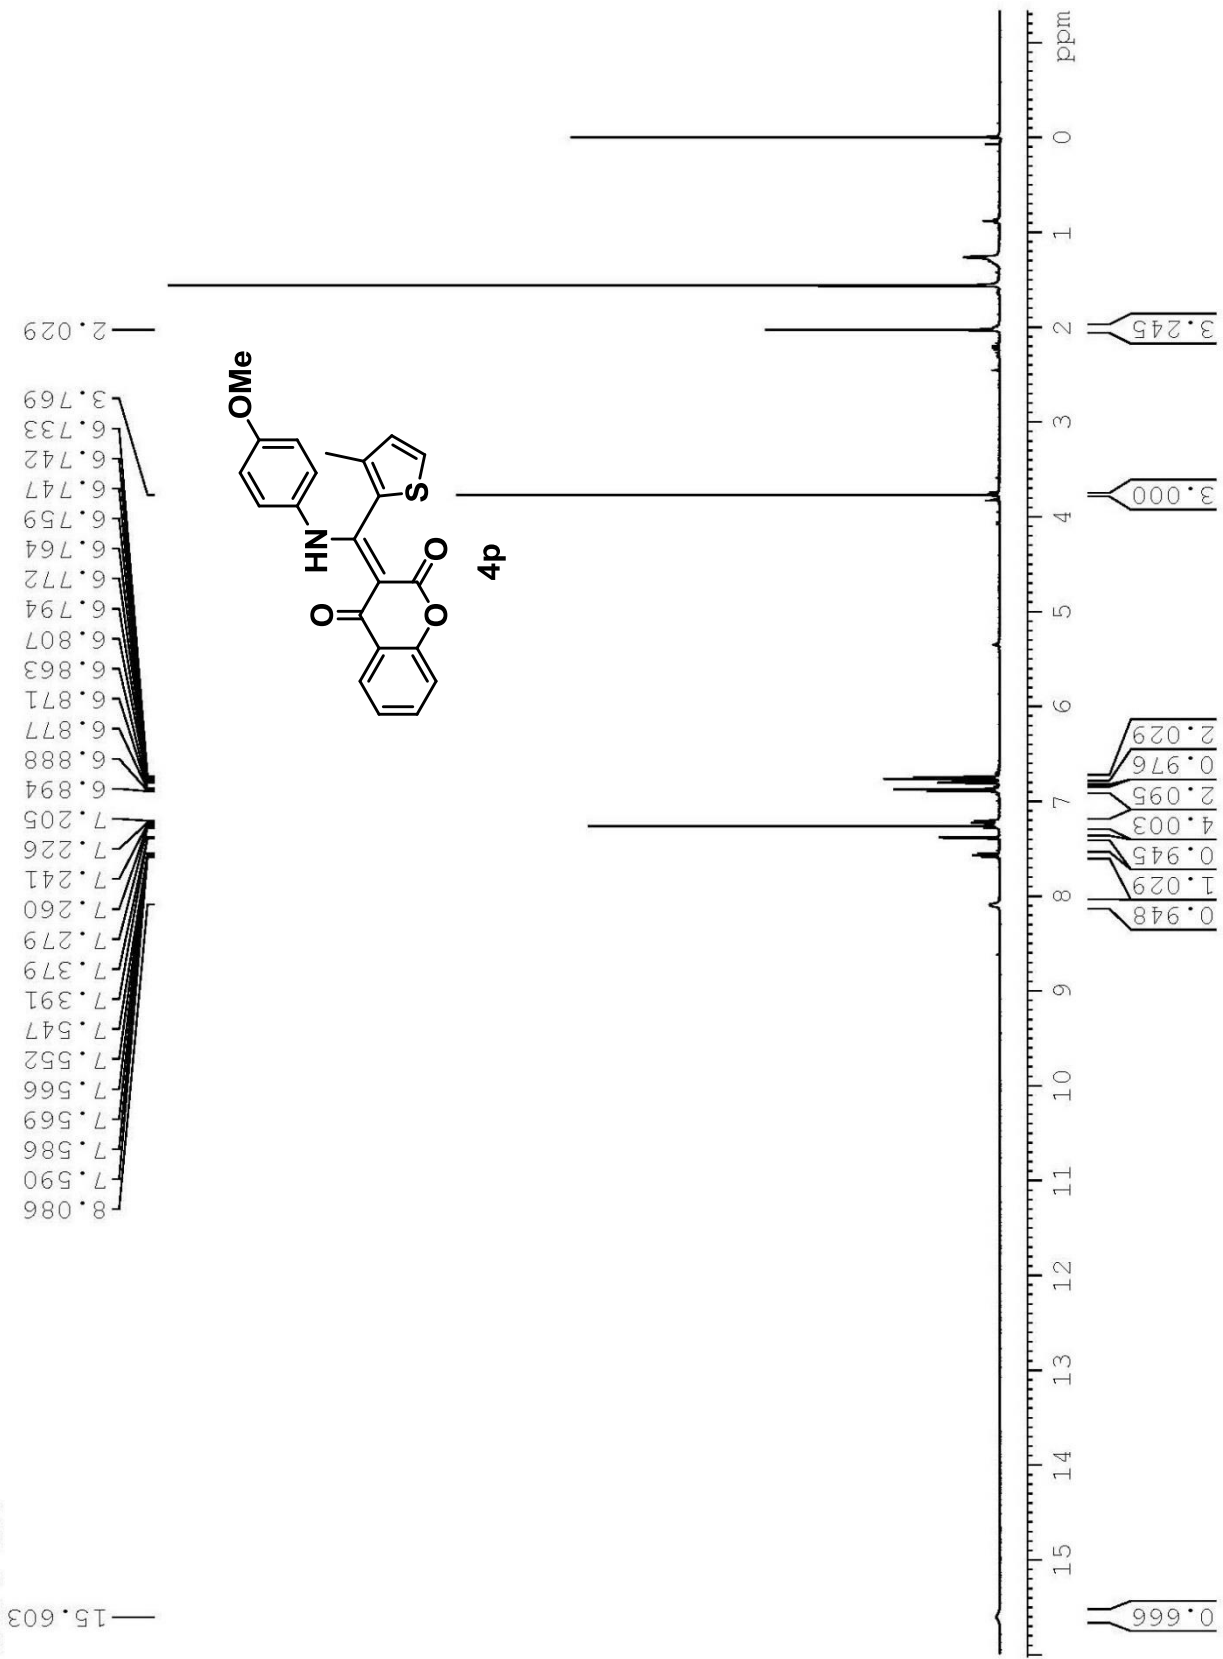

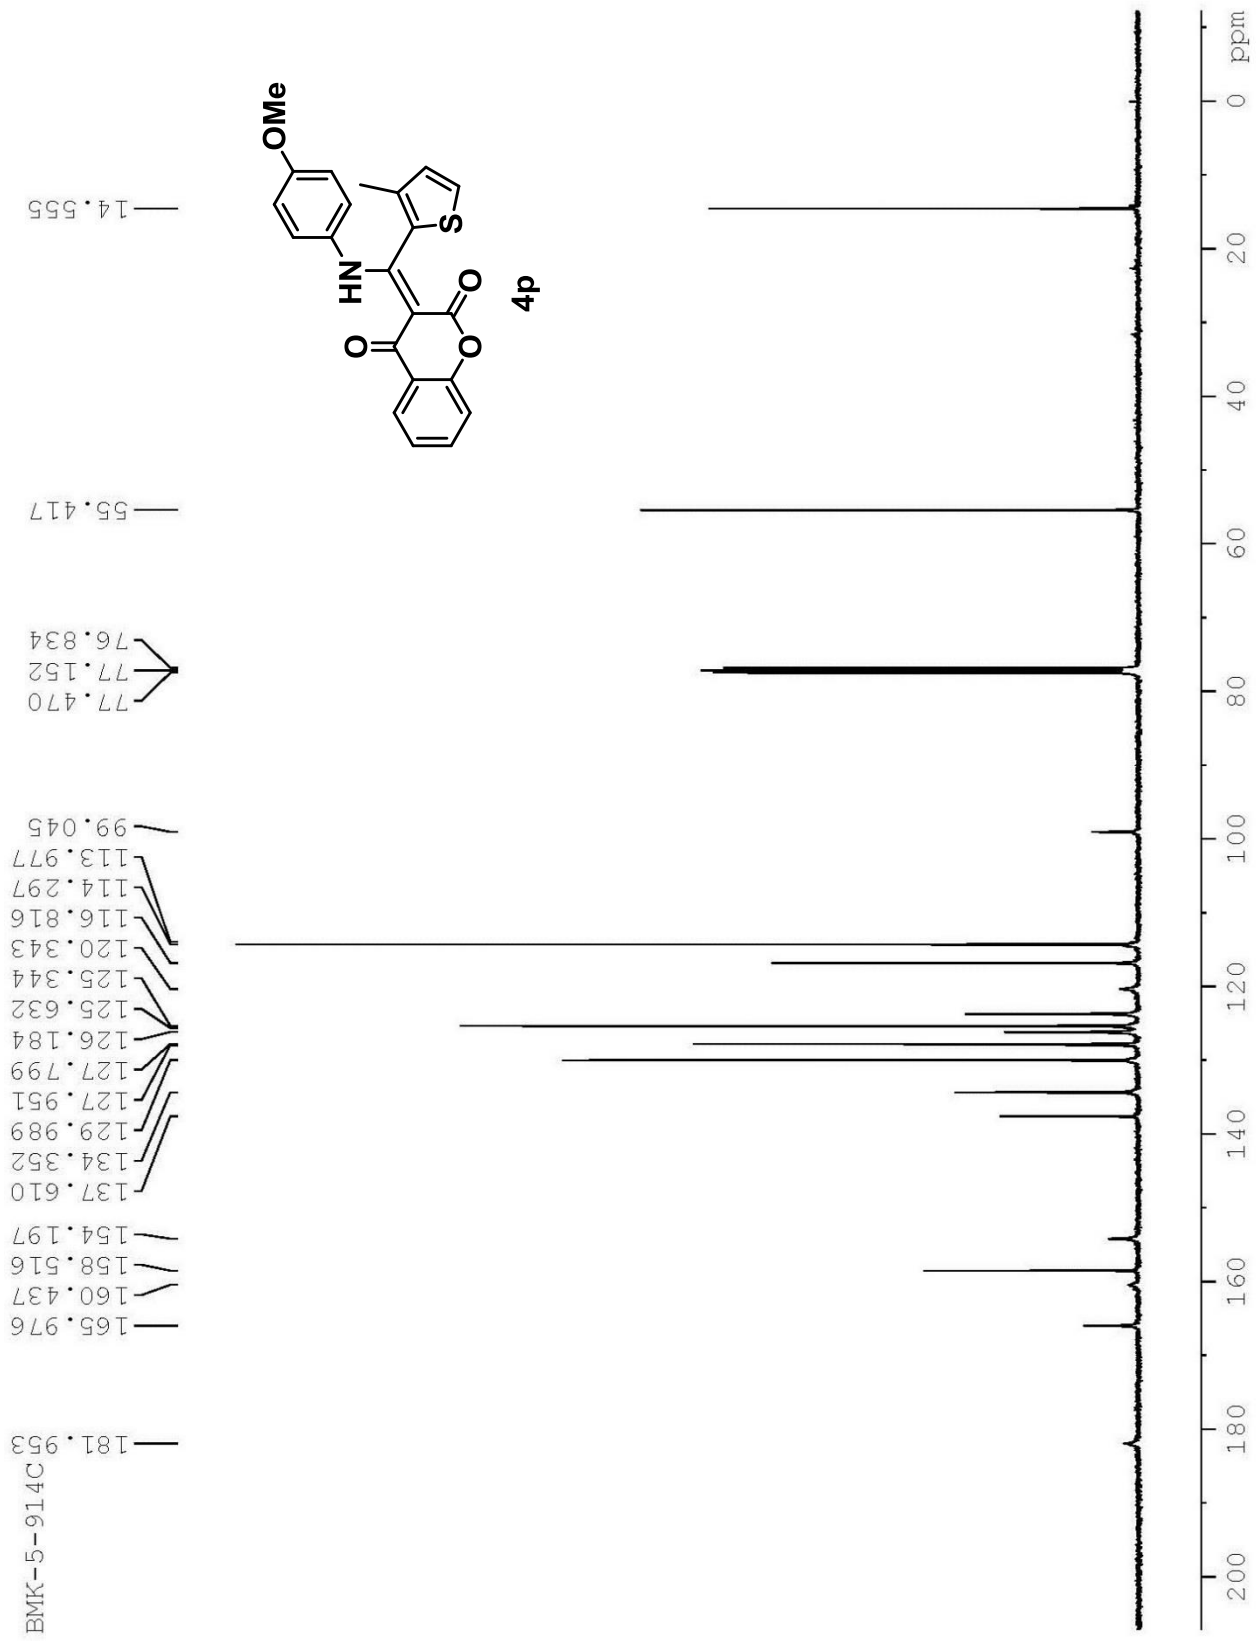

BMK-50887

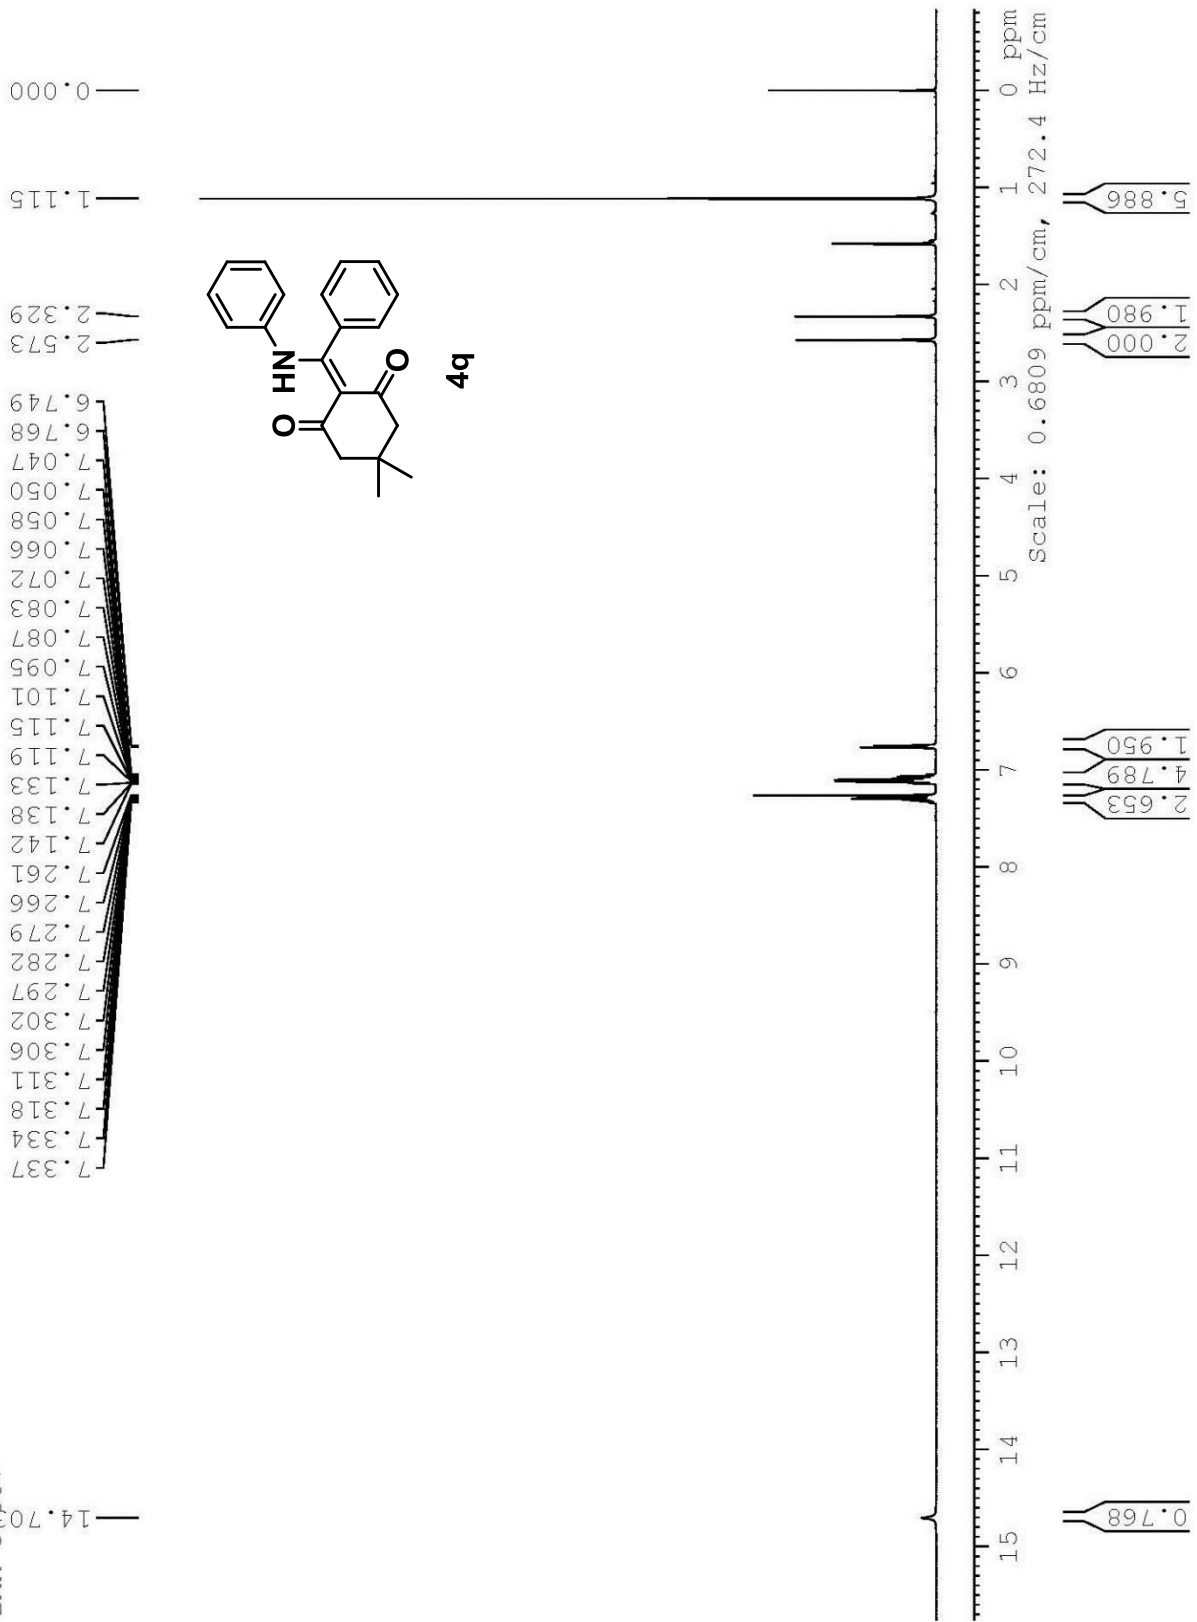

BMK-5-887C

— 200.379  
— 195.332

— 169.219

137.204  
134.049  
129.000  
128.750  
128.254  
127.743  
126.415  
125.128  
— 108.490

77.468  
77.150  
76.831

53.313  
52.476

30.339  
28.486

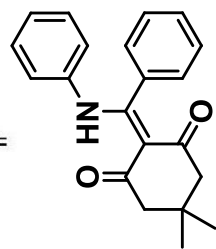

4q

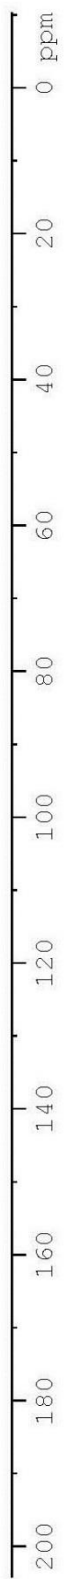

BMK-5-893-1

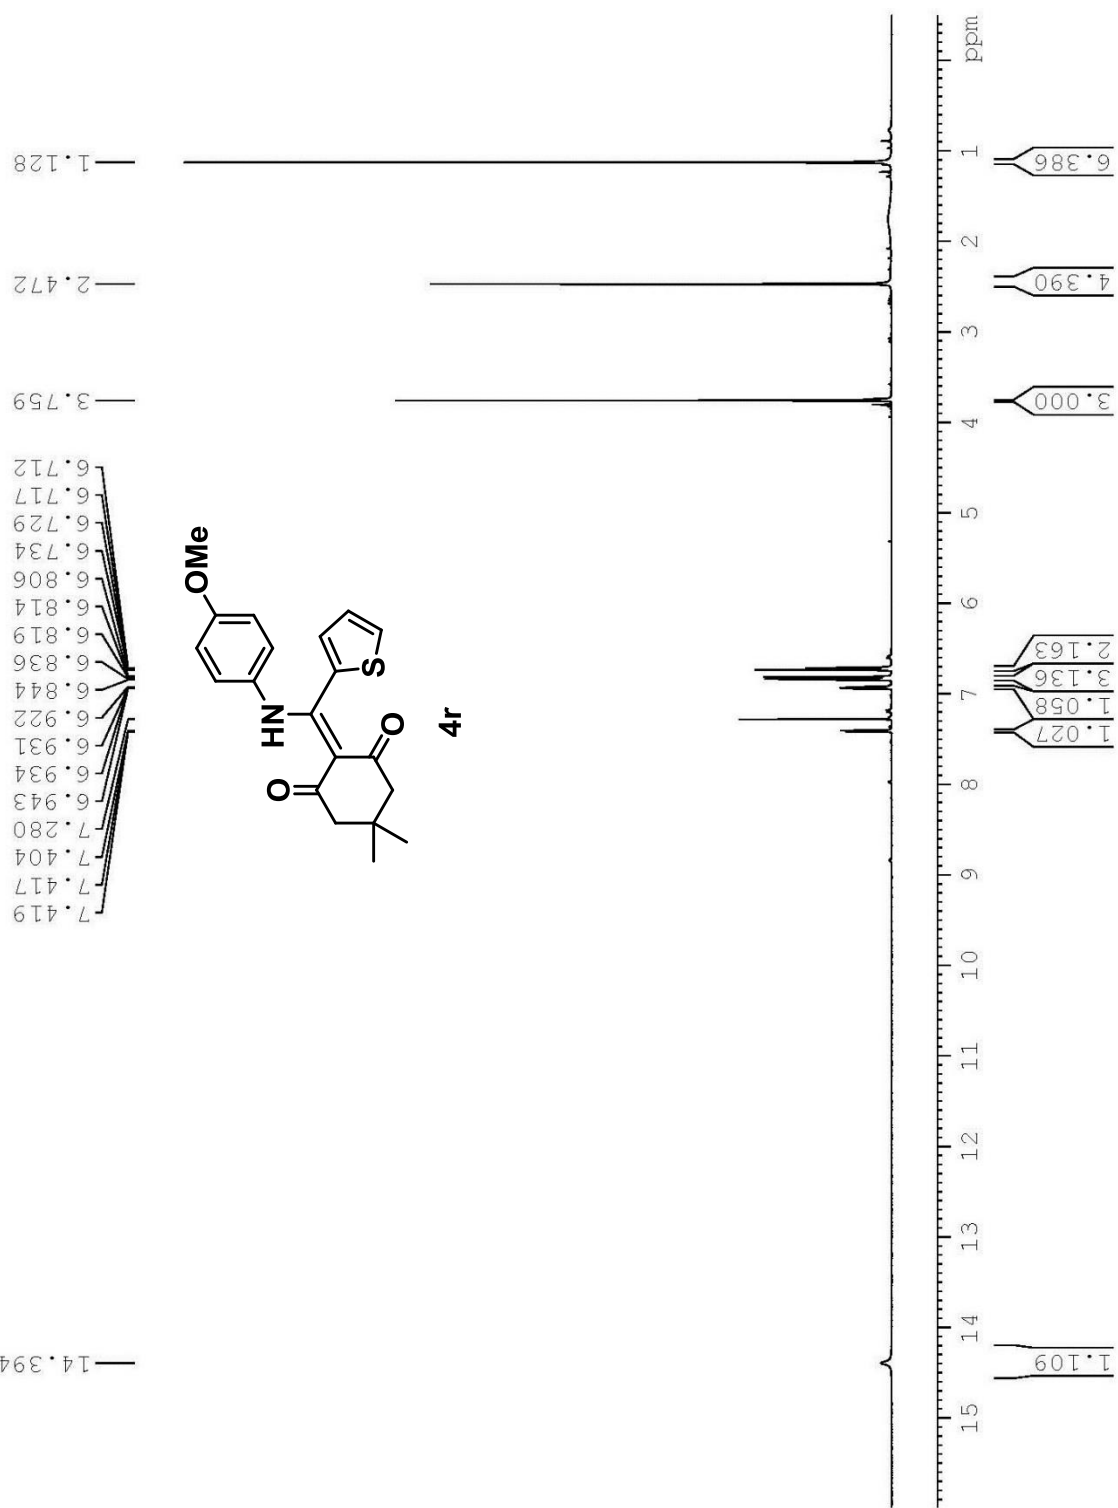

BMK-5-893C

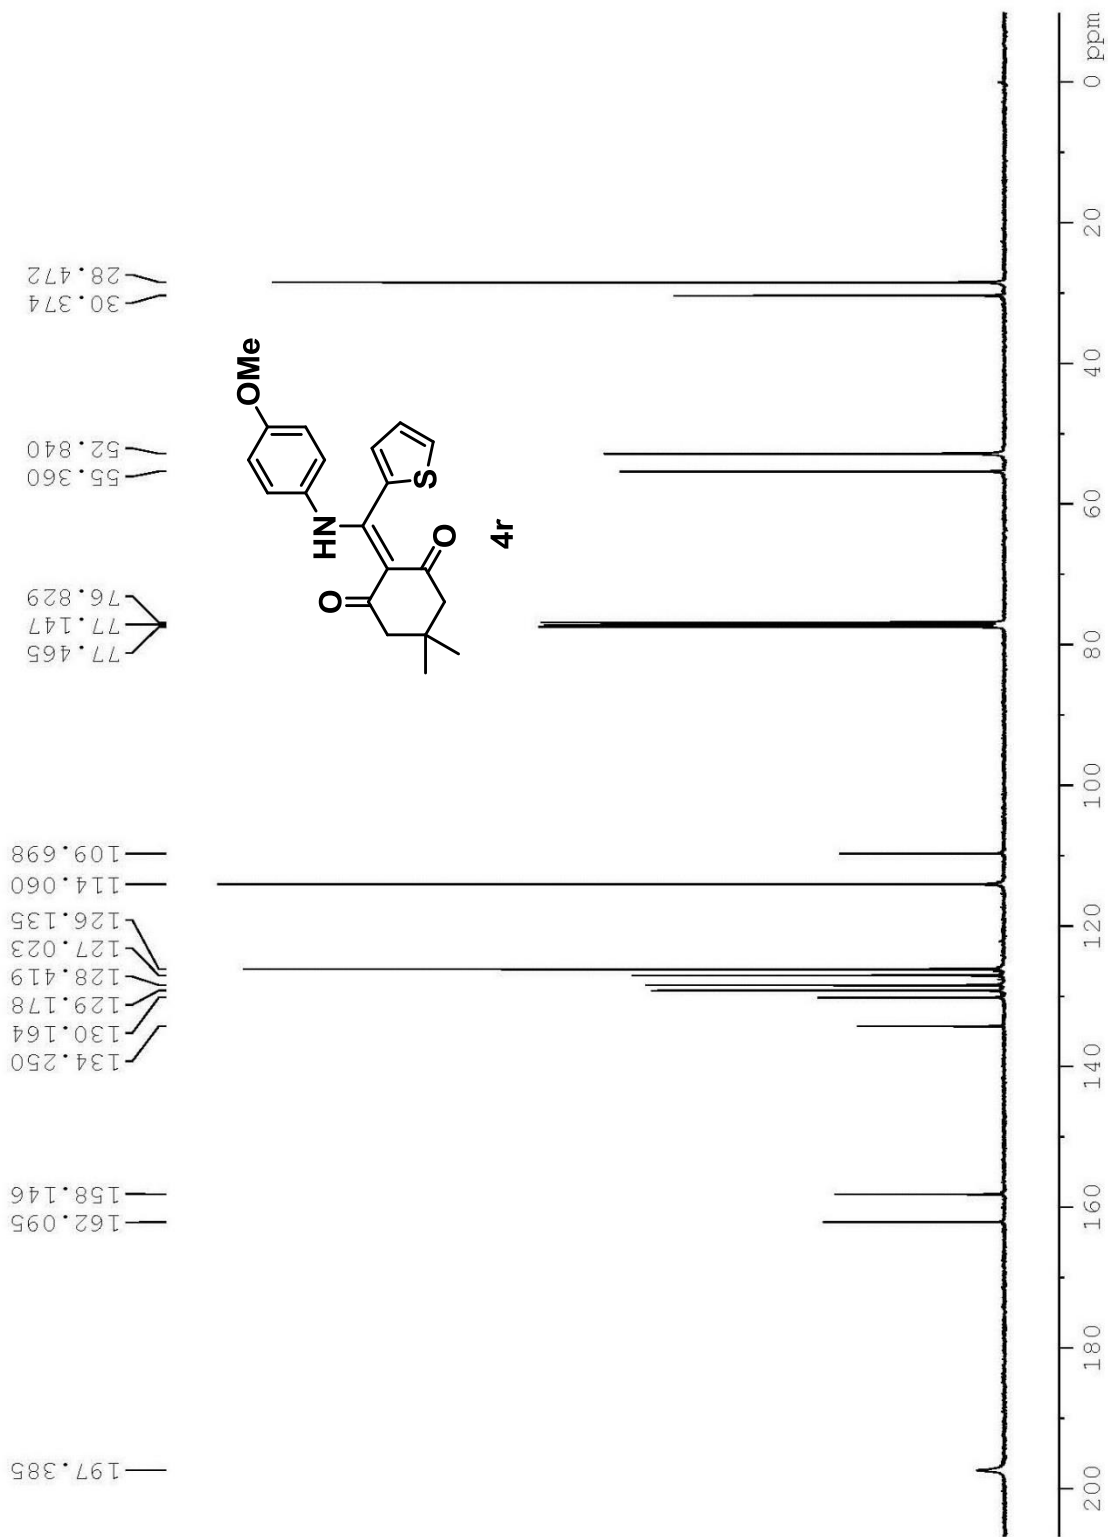

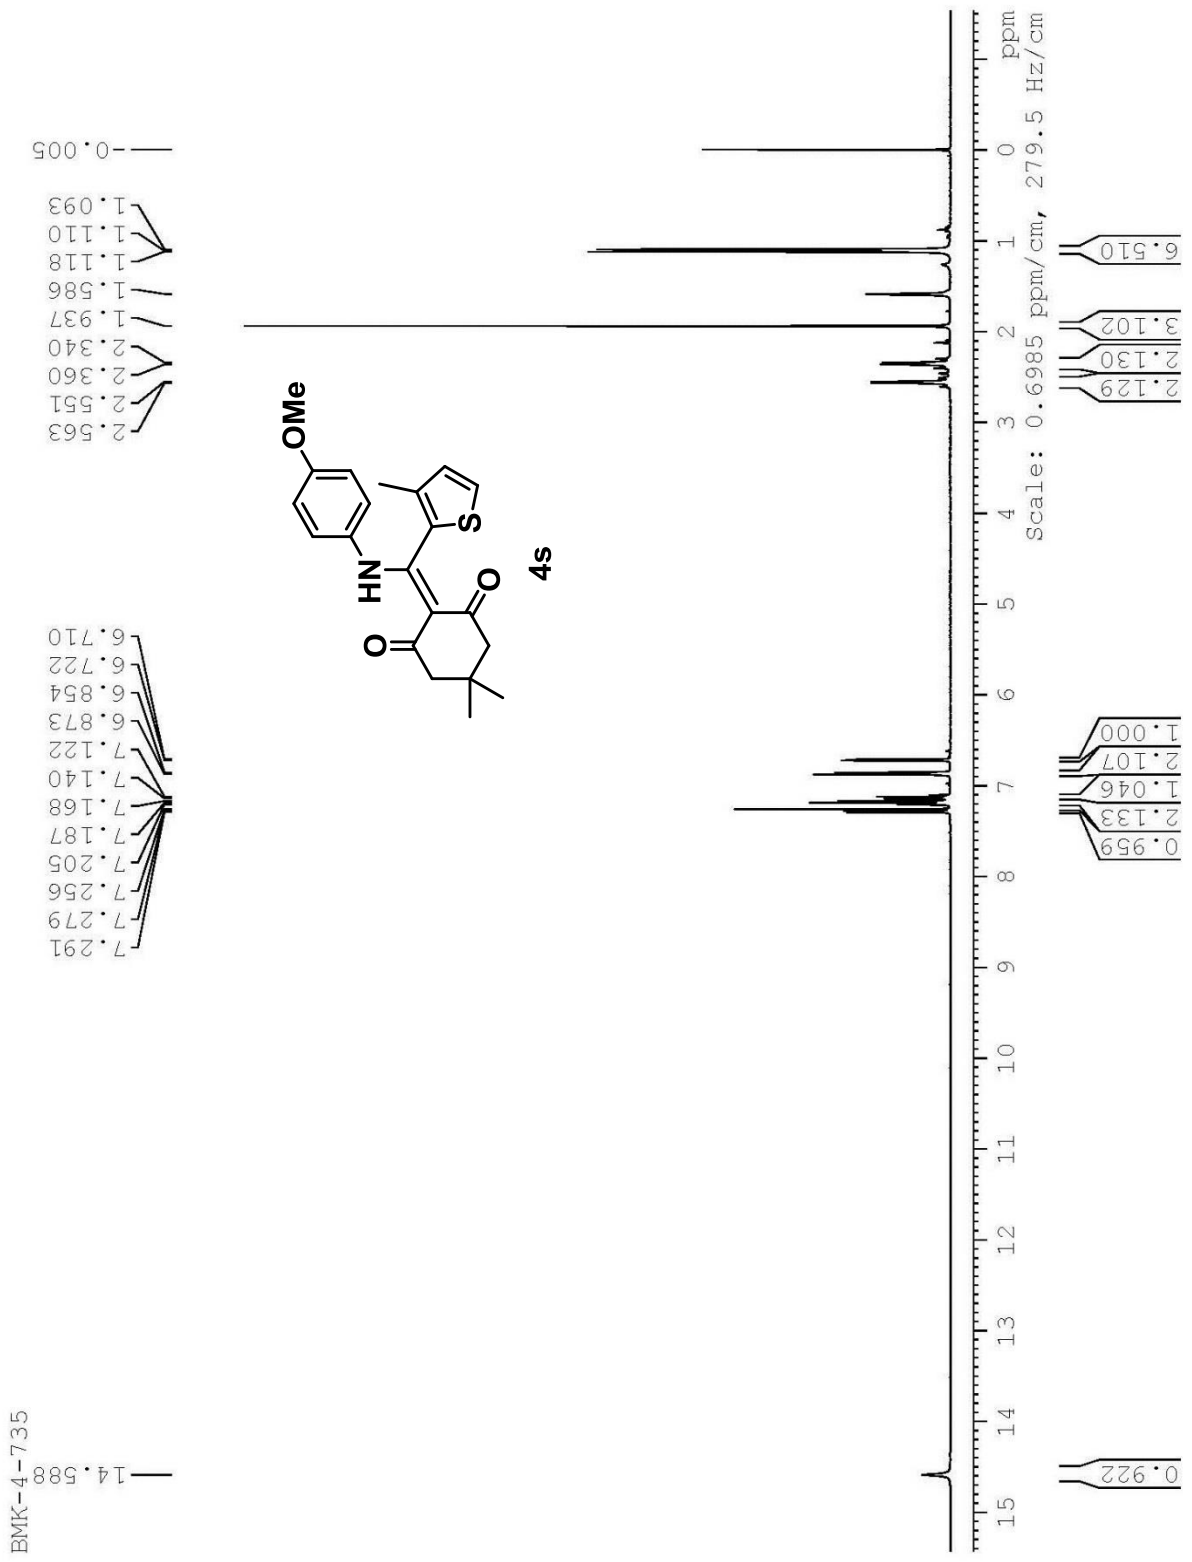



BMK-5-735C

- 199.966
- 194.942
- 161.765
- 137.447
- 136.915
- 129.767
- 129.018
- 128.868
- 126.981
- 126.557
- 124.152
- 109.986
- 77.479
- 77.161
- 76.843
- 53.293
- 52.424
- 30.234
- 28.642
- 28.328
- 14.455

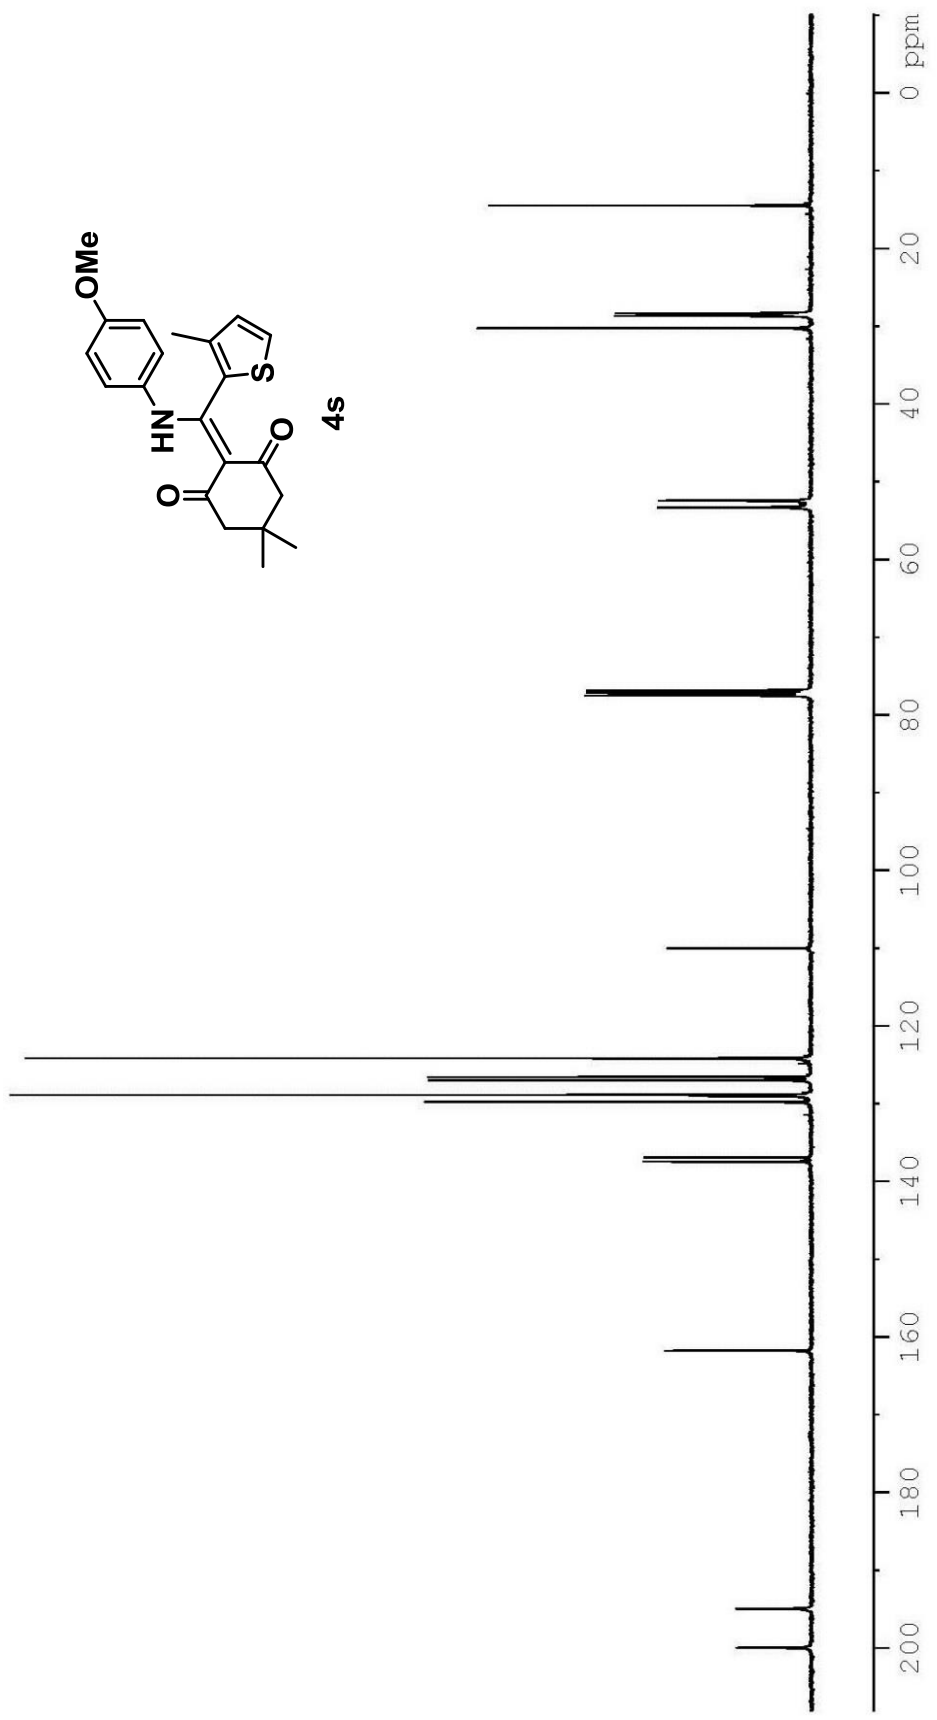

4s

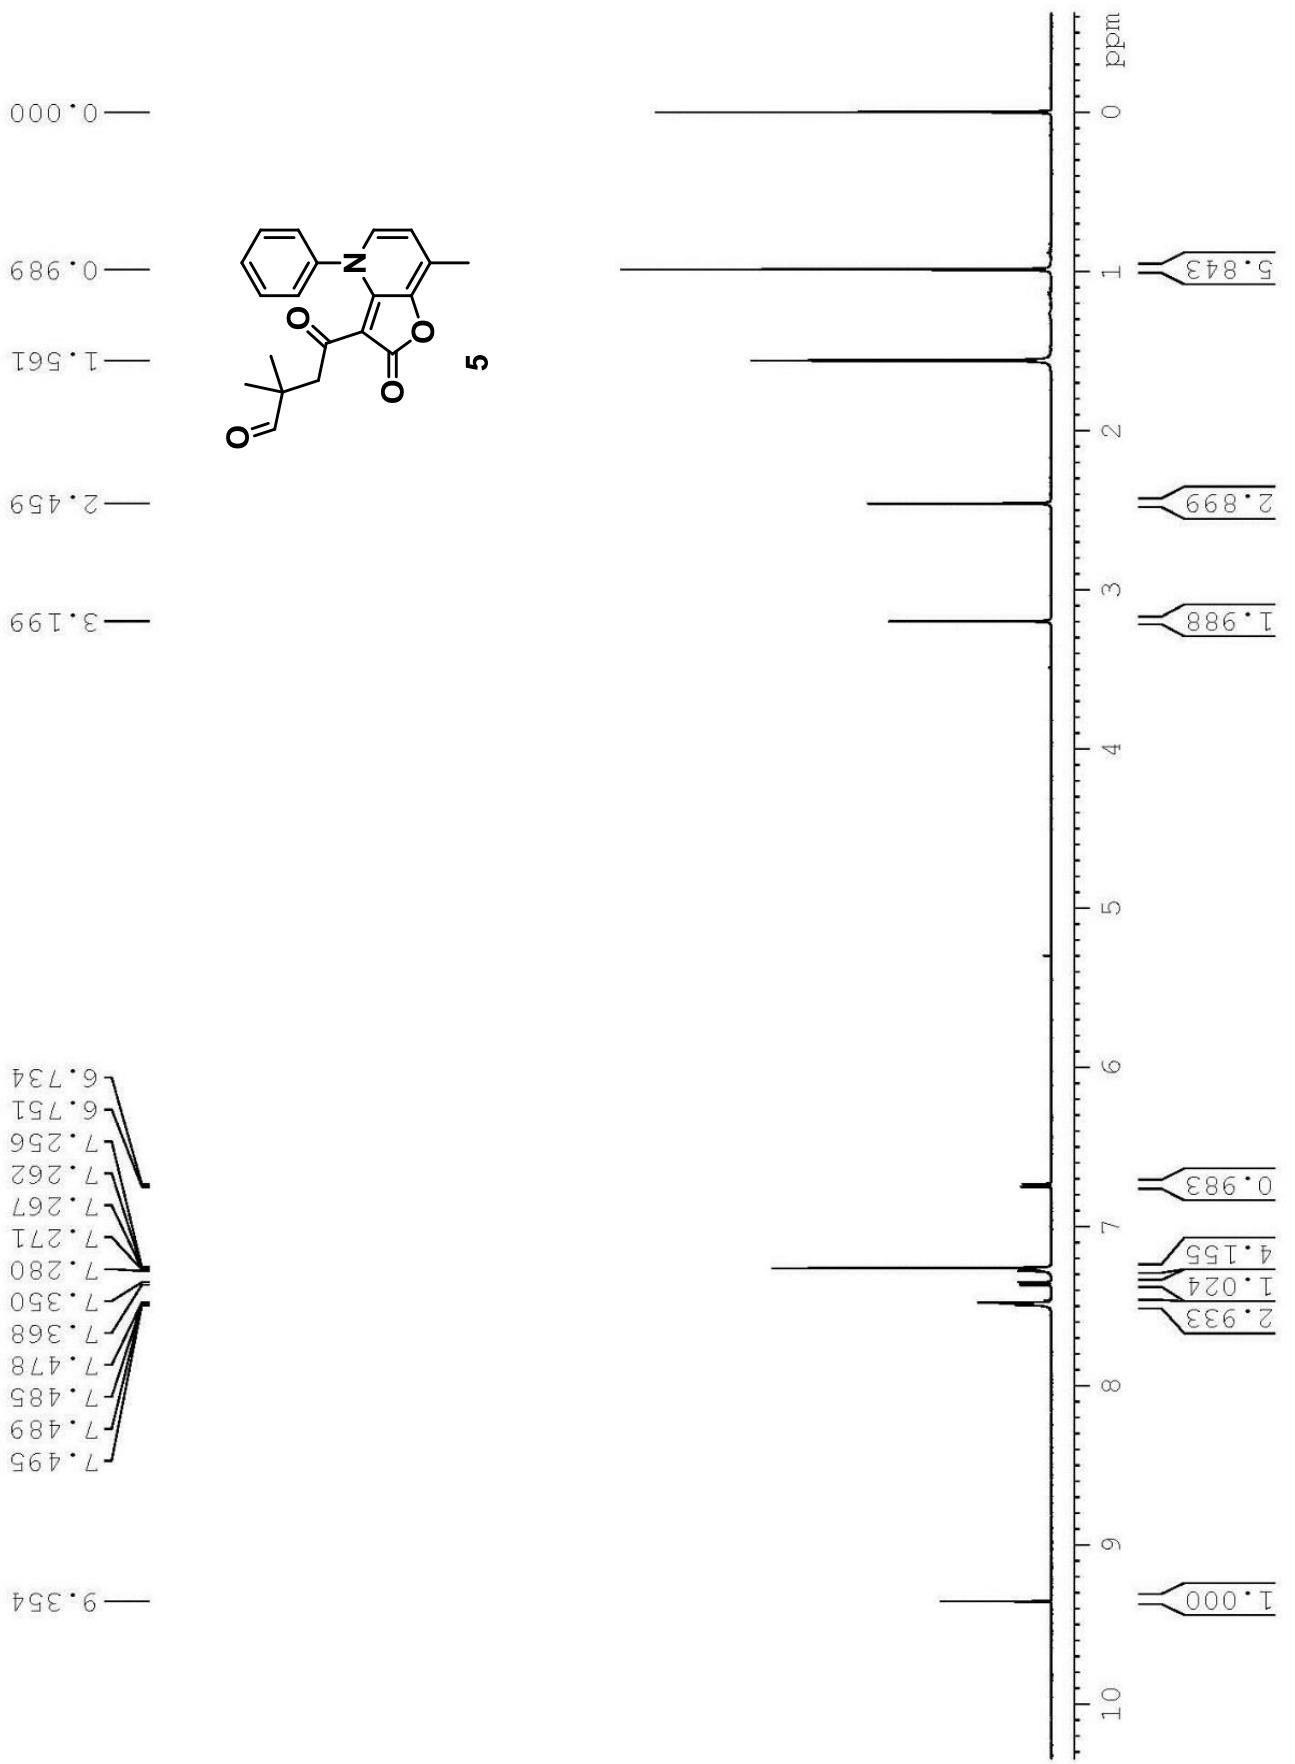

BMK-5-889-N

BMK-5-889-C

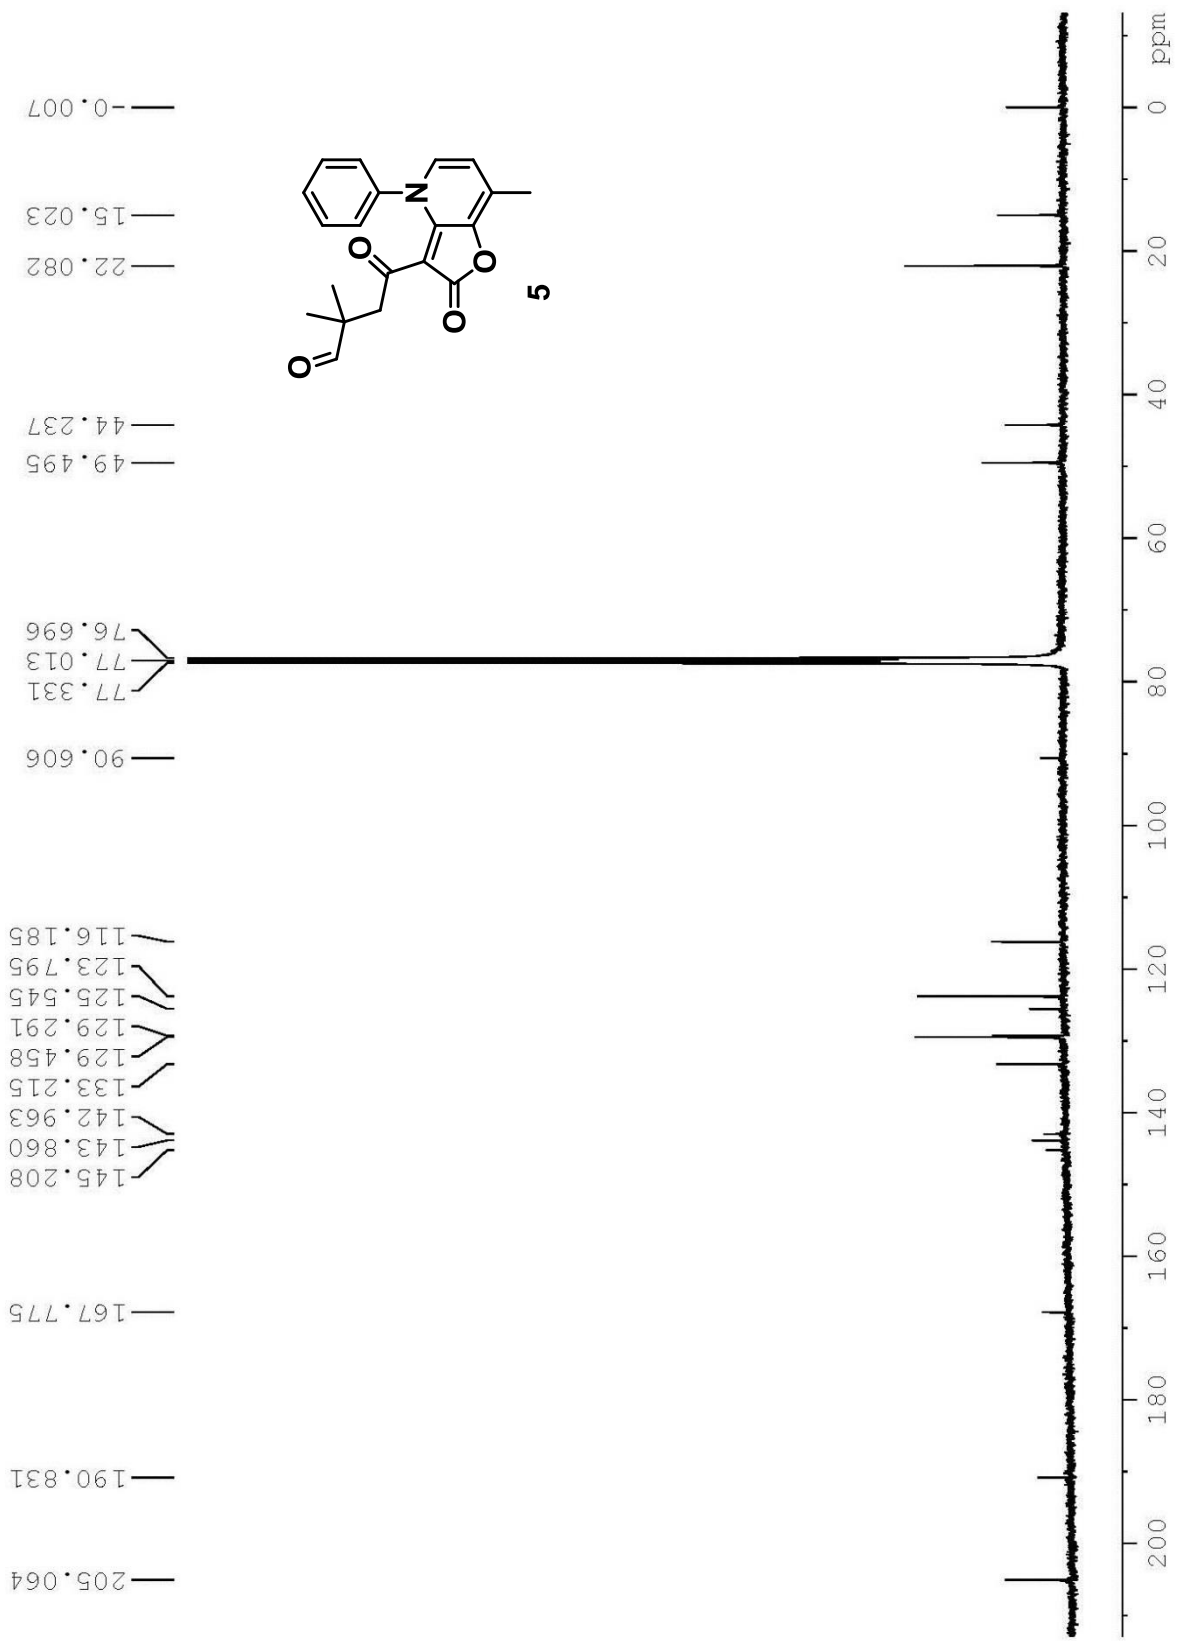

Supplement: c9ra07598d1.pdf [file c9ra07598d1.pdf]
